# 1 **Integrated Multi-omic Framework of the Plant Response to Jasmonic Acid**

2

3 Mark Zander<sup>1,2,3,11</sup>, Mathew G. Lewsey<sup>4,5,11,\*</sup>, Natalie M. Clark<sup>6</sup>, Lingling Yin<sup>4,5</sup>, Anna Bartlett<sup>2,3</sup>, J.  
4 Paola Saldierna Guzmán<sup>1,7</sup>, Elizabeth Hann<sup>1,8</sup>, Amber E. Langford<sup>1</sup>, Bruce Jow<sup>2,3</sup>, Aaron Wise<sup>9</sup>,  
5 Joseph R. Nery<sup>2,3</sup>, Huaming Chen<sup>2</sup>, Ziv Bar-Joseph<sup>9</sup>, Justin W. Walley<sup>6</sup>, Roberto Solano<sup>10</sup> and  
6 Joseph R. Ecker<sup>1,2,3,\*</sup>

7

8 <sup>1</sup>Plant Biology Laboratory, Salk Institute for Biological Studies, La Jolla, CA 92037, USA

9 <sup>2</sup>Genomic Analysis Laboratory, Salk Institute for Biological Studies, La Jolla, CA 92037, USA

10 <sup>3</sup>Howard Hughes Medical Institute, Salk Institute for Biological Studies, La Jolla, CA 92037, USA

11 <sup>4</sup>Centre for AgriBioscience, Department of Animal, Plant and Soil Sciences, School of Life  
12 Sciences, La Trobe University, Melbourne, VIC 3086, Australia

13 <sup>5</sup>Australian Research Council Industrial Transformation Research Hub for Medicinal Agriculture,  
14 Centre for AgriBioscience, La Trobe University, Bundoora, VIC 3086, Australia

15 <sup>6</sup>Plant Pathology and Microbiology, Iowa State University, Ames, IA 50011, USA

16 <sup>7</sup>Present address: School of Natural Sciences, University of California Merced, Merced, CA  
17 95343, USA

18 <sup>8</sup>Present address: Department of Chemical and Environmental Engineering, Department of  
19 Botany and Plant Sciences, University of California, Riverside, CA 92521, USA

20 <sup>9</sup>Computational Biology Department, School of Computer Science, Carnegie Mellon University,  
21 Pittsburgh, PA 15213, USA

22 <sup>10</sup>Department of Plant Molecular Genetics, Centro Nacional de Biotecnología, Consejo Superior  
23 de Investigaciones Científicas (CNB-CSIC), 28049 Madrid, Spain

24 <sup>11</sup>These authors contributed equally

25 \*Authors for correspondence: Joseph R. Ecker ([ecker@salk.edu](mailto:ecker@salk.edu)), Mathew G. Lewsey  
26 ([m.lewsey@latrobe.edu.au](mailto:m.lewsey@latrobe.edu.au))

27 **Abstract**

28 Understanding the systems-level actions of transcriptional responses to hormones provides  
29 insight into how the genome is reprogrammed in response to environmental stimuli. Here, we  
30 investigate the signaling pathway of the hormone jasmonic acid (JA), which controls a plethora of  
31 critically important processes in plants and is orchestrated by the transcription factor MYC2 and  
32 its closest relatives in *Arabidopsis thaliana*. We generated an integrated framework of the  
33 response to JA that spans from the activity of master and secondary-regulatory transcription  
34 factors, through gene expression outputs and alternative splicing to protein abundance changes,  
35 protein phosphorylation and chromatin remodeling. We integrated time series transcriptome  
36 analysis with (phospho)proteomic data to reconstruct gene regulatory network models. These  
37 enable us to predict previously unknown points of crosstalk from JA to other signaling pathways  
38 and to identify new components of the JA regulatory mechanism, which we validated through  
39 targeted mutant analysis. These results provide a comprehensive understanding of how a plant  
40 hormone remodels cellular functions and plant behavior, the general principles of which provide  
41 a framework for analysis of cross-regulation between other hormone and stress signaling  
42 pathways.

43

44

45

46

47

48

49

50

51

52

## 53 Introduction

54 Plant hormones are structurally unrelated small signaling molecules that play pivotal roles in a  
55 wide range of fundamental processes of plants spanning growth, development and responses to  
56 environmental stimuli (Vanstraelen and Benkova, 2012). Hormone perception by plants  
57 stimulates a cascade of transcriptional reprogramming that ultimately modifies cellular function  
58 and plant behavior (Chang et al., 2013, Song et al., 2016, Hickman et al., 2017, Pauwels et al.,  
59 2008). This is initiated by one or a family of high-affinity receptors, followed by signal transduction  
60 through protein-protein interactions, post-translational modification events and regulation of  
61 transcription factor (TF) activity that ultimately drives changes in gene expression (Wang et al.,  
62 2015, Song et al., 2016, Chang et al., 2013).

63 One of the key plant hormones is methyl jasmonate (JA), which regulates crucial  
64 processes including fertility, seedling emergence, the response to wounding and the growth-  
65 defense balance (Huang et al., 2017). Jasmonates are perceived as jasmonoyl-isoleucine (JA-  
66 Ile) by the co-receptor COI1 (CORONATINE INSENSITIVE1)/JAZ (Jasmonate ZIM domain)  
67 complex (Thines et al., 2007, Chini et al., 2007, Fonseca et al., 2009, Sheard et al., 2010). COI1  
68 is an F-box protein and part of a Skp-Cullin-F-box-E3 ubiquitin ligase complex (SCF<sup>COI1</sup>) (Xie et  
69 al., 1998) that targets JAZ proteins for proteasomal degradation upon JA perception. JAZs are  
70 transcriptional repressor proteins that inhibit the activity of key TFs of the JA pathway such as the  
71 basic helix-loop-helix (bHLH) TF MYC2 and its closest homologues MYC3, MYC4 and MYC5  
72 (Fernandez-Calvo et al., 2011, Song et al., 2017, Lorenzo et al., 2004) in the absence of JA. The  
73 SCF<sup>COI1</sup>-JAZ complex tightly controls the level of free non-repressed MYCs in a JA-dependent  
74 manner thereby determining the transcriptional output of the entire JA response (Chini et al.,  
75 2007, Thines et al., 2007, Zhang et al., 2015a). The key regulatory step in the JA pathway is the  
76 hormone-triggered formation of a complex between the E3 ligase SCF<sup>COI1</sup> and JAZ repressors  
77 that are bound to the master TF MYC2. This results in degradation of JAZ repressors and permits  
78 the activity of a master regulatory bHLH transcription factor MYC2, accompanied by MYC3,

79 MYC4, MYC5 and numerous other transcription factors, all of which have distinct but overlapping  
80 roles in driving JA-responsive gene expression (Song et al., 2017, Schweizer et al., 2013b,  
81 Fernandez-Calvo et al., 2011, Lorenzo et al., 2004, Bao et al., 2019). The result is a cascade of  
82 JA-induced genome reprogramming to modulate plant behavior such as plant immune responses  
83 (Du et al., 2017, Hickman et al., 2017). However, our knowledge of the JA-responsive genome  
84 regulatory program and, more broadly, in the plants general response to environmental stimuli is  
85 limited currently by assessment of only one or a small number of components.

86 Here we aim to decipher MYC2/MYC3-driven JA-responsive gene expression using  
87 a multi-omics analysis that includes the direct targets of key transcription factors, chromatin  
88 modifications, global protein abundance and protein phosphorylation. We discovered that  
89 MYC2/MYC3 directly target hundreds of TFs, resulting in a large transcriptional network that  
90 facilitates extensive crosstalk with other signaling pathways. This model predicted new  
91 components of the JA signaling pathway that we validated by targeted genetic analyses,  
92 demonstrating the power of our integrated multi-omic approach to yield fundamental biological  
93 insight into plant hormone responses.

94

## 95 **Results**

### 96 **MYC2 and MYC3 binding is associated with a large proportion of JA-responsive genes**

97 To decipher the JA-governed regulatory network with its high degree of dynamic and spatio-  
98 temporal interconnectivity with other signaling pathways, we applied a multi-omic network  
99 approach that is comprised of five newly generated large-scale datasets (Fig. 1a, b). MYC2 is the  
100 master regulatory transcription factor of JA responses and plants with a null mutation causing a  
101 clear decrease in JA sensitivity (Lorenzo et al., 2004). Thus, we included the *myc2 (jin1-8*  
102 *SALK\_061267)* mutant into our analyses (Fig. 1b) (Lorenzo et al., 2004). MYC2 is responsible for  
103 strong JA-responsive gene activation and acts additively with MYC3 and MYC4 (Lorenzo et al.,

104 2004, Fernandez-Calvo et al., 2011). *myc3* and *myc4* single mutants behave like wildtype with  
105 regards to JA-induced root growth inhibition. However, in combination with the *myc2* mutant,  
106 *myc2 myc3* double mutants exhibit an increased JA hyposensitivity, almost as pronounced as in  
107 *myc2 myc3 myc4* triple mutants (Fernandez-Calvo et al., 2011). We consequently selected MYC3  
108 for an in-depth analysis.

109 In order to better understand how the master TFs MYC2 and MYC3 control the JA-  
110 induced transcriptional cascade, we determined their genome-wide binding sites using chromatin  
111 immunoprecipitation sequencing (ChIP-seq). Four biological replicates of JA-treated (2 hours)  
112 three-day-old etiolated *Arabidopsis* seedlings that express a native promoter-driven and epitope  
113 (YPet)-tagged version of MYC2 and three biological replicates of MYC3 (Col-0 *MYC2::MYC2-*  
114 *Ypet*, Col-0 *MYC3::MYC3-Ypet*) were used (Gimenez-Ibanez et al., 2017). The genome-wide  
115 distributions of MYC2 and MYC3 binding sites were highly similar (Fig. 1c, d). We identified 6,736  
116 MYC2 and 3,982 MYC3 binding sites of high confidence, equating to 6,178 MYC2 and 4,092  
117 MYC3 target genes (Fig. 1d and Supplementary Table 1). Of the target genes identified, 3,847  
118 were shared, meaning that almost all MYC3 target genes are also bound by MYC2 (Fig. 1d). Their  
119 target genes were enriched for JA-related gene ontology terms and for terms related to other  
120 hormones (Zhang et al., 2014, Abe et al., 2003) (Supplementary Fig. 1a). Collectively, these data  
121 indicate that MYC2 and MYC3 have the potential to regulate 23.2% of genes in the *Arabidopsis*  
122 genome (27,655 coding genes). However, binding events are not necessarily regulatory (Chang  
123 et al., 2013, Song et al., 2016, Fernandez et al., 2003). We determined that 2,522 genes are  
124 differently expressed (false discovery rate, FDR <0.05) after two hours of JA treatment using  
125 RNA-seq. A third (843 genes) of JA-modulated genes were directly bound by MYC2 or MYC3  
126 (Fig. 1d and Supplementary Table 2). This is consistent with the important role of MYC2/3 in JA-  
127 responsive gene expression (Lorenzo et al., 2004, Fernandez-Calvo et al., 2011, Schweizer et  
128 al., 2013b). The majority of JA-responsive direct MYC2/3 target genes are transcriptionally

129 upregulated after JA application indicating that MYC2 and MYC3 predominantly act as  
130 transcriptional activators (Supplementary Fig. 1b).

131           The G-Box (CAC/TGTG) was the most common DNA sequence motif found at MYC2  
132 or MYC3 binding sites, which is concordant with the observation that they shared a large  
133 proportion of their binding sites (Fig. 1e, f). This motif was also of similar sequence to a motif  
134 bound by MYC2 determined *in vitro* (Godoy et al., 2011). The majority of MYC2 and MYC3 binding  
135 sites contained the G-Box motif (MYC2: 4,240 of 6,736; MYC3: 3,072 of 3,982; Fig. 1e, f and  
136 Supplementary Table 3). However, the absence of the motif from a substantial number of MYC2  
137 and MYC3 binding sites suggests the transcription factors may bind indirectly to some sites  
138 through partner protein(s).

139           Master TFs directly target the majority of signaling components in their respective  
140 pathway, a phenomenon which has already been observed already for the ethylene, abscisic acid  
141 and cytokinin signaling pathways (Chang et al., 2013, Song et al., 2016, Xie et al., 2018). This  
142 pattern also holds true for the JA signaling pathway. Our MYC2/MYC3 ChIP-seq analyses  
143 determined that approximately two thirds of genes encoding for known JA pathway components  
144 (112 of 168 genes for MYC2 and 96 of 168 genes for MYC3) are bound by MYC2 and MYC3  
145 (Supplementary Fig. 1c, d and Supplementary Table 4). Interestingly, the majority of all known JA  
146 genes that were differentially expressed following JA treatment were bound by MYC2 or MYC3  
147 whereas fewer non-differentially expressed known JA genes were directly targeted  
148 (Supplementary Fig. 1c and Supplementary Table 4). MYCs initiate various feed forward loops  
149 that allow a rapid activation of the transcriptional JA response (Du et al., 2017, Liu et al., 2019).  
150 Our ChIP-seq approach revealed that besides the autoregulation of MYC2 and MYC3, they also  
151 regulate JA biosynthesis either indirectly through binding to the AP2-ERF transcription factor gene  
152 *ORA47* (Chen et al., 2016a) or directly by targeting the JA biosynthesis genes *LOX2* and *AOS2*  
153 (Supplementary Table 4). In addition, MYCs simultaneously target various negative regulators  
154 enabling MYCs to efficiently dampen the JA response pattern. Key negative regulators of JA

155 signaling are the JAZ repressors, a gene family of 13 members in *Arabidopsis* (Guo et al., 2018,  
156 Chung et al., 2010, Cuellar Perez et al., 2014) which can interact with the adaptor protein NINJA  
157 to confer TOPLESS-mediated gene repression (Pauwels et al., 2010). Strikingly, all JAZs and  
158 also NINJA are directly bound by MYC2 and MYC3 (Supplementary Fig. 1e), with the probable  
159 effect of dampening the JA response thereby preventing excessive activation of JA signaling.

## 160 **MYC2 and MYC3 activate the transcriptional JA response through a large transcription** 161 **factor network**

162 To decipher the MYC2 and MYC3-governed transcriptional regulatory network in more detail, we  
163 investigated the relationship between MYC2/MYC3-bound TF-encoding genes and their  
164 transcriptional responsiveness to JA treatment. We conducted a JA time course experiment (time  
165 points 0, 0.25, 0.5, 1, 2, 4, 8, 12, 24 h post JA treatment) identifying a total of 7,377 differentially  
166 expressed genes at one or more time points within 24 h of JA treatment (Supplementary Table  
167 2). Differentially expressed genes were categorized into clusters with similar expression trends  
168 over time to facilitate visualization of complex expression dynamics and enriched functional  
169 annotations (Supplementary Fig. 2a and Supplementary Table 5). The largest upregulated cluster  
170 was the “JA cluster” which was enriched for gene ontology (GO) terms associated with JA  
171 responses (Fig. 2a). In contrast, the “Cell wall cluster” was the largest cluster of downregulated  
172 genes and enriched for GO terms associated with cell wall organization, development and  
173 differentiation (Fig. 2b). These two main clusters illustrate the defense-growth trade-off that plants  
174 are faced when defense pathways are activated (Huot et al., 2014).

175 Up to 63% (0.5 h JA treatment) of differentially expressed genes at any given time  
176 point were directly bound by MYC2 and/or MYC3 (Fig. 2c), highlighting the important role of MYCs  
177 in transcriptionally regulating JA responses. Our analysis also determined that 522 of 1,717  
178 known or predicted TFs were differentially expressed within 24 h of JA treatment (Supplementary  
179 Fig. 2b). Half of these (268), representing 36 of 58 TF families, were also direct MYC2 or MYC3

180 targets (Fig. 2d and Supplementary Fig. 2b) indicating that MYC2 and MYC3 cooperatively control  
181 a massive TF network. The three most numerous families (ERFs, bHLHs and MYBs) in the  
182 *Arabidopsis* genome had the most JA-responsive MYC2 or MYC3 targeted members which is  
183 concordant with their previously annotated roles in JA responses (Fig. 2d) (Chen et al., 2016b).  
184 Plant hormone crosstalk is critical for an appropriate cellular response to environmental stimuli  
185 and numerous reports describe that MYC2 connects the JA pathway to other major plant hormone  
186 pathways (Hou et al., 2010, Lorenzo et al., 2004, Aleman et al., 2016, Zhang et al., 2014, Cui et  
187 al., 2018, Pieterse et al., 2009). To investigate this crosstalk function of MYC2 and MYC3 in more  
188 detail, we utilized our ChIP-seq data to determine the number of plant hormone TFs that are  
189 bound by MYC2 and MYC3. We found that 37 to 59% of annotated hormone pathway genes are  
190 bound by MYC2 and MYC3 and that their expression changes in response to 24 hours of JA  
191 treatment (Supplementary Fig. 2c). In addition, we discovered 122 annotated hormone TFs, with  
192 representatives from all hormone pathways, that are bound by MYC2 and MYC3 and 118 of these  
193 are differentially expressed (Supplementary Fig. 2d and Supplementary Table 1).

194 We next set out to better understand the target genes of the network of TFs downstream  
195 of MYC2 and MYC3. To do so we conducted ChIP-seq or DNA affinity purification sequencing  
196 (DAP-seq) (O'malley et al., 2016, Bartlett et al., 2017), on a subset of TFs that were direct MYC2/3  
197 targets and rapidly upregulated (within 0.5 h) by JA treatment (DREB2B, ATAF2, HY5, RVE2,  
198 ZAT18; Fig. 2e) or were members of the upregulated "JA cluster" (TCP23; Fig. 2a). We also  
199 included TFs with known roles in JA signaling (ERF1, ORA59, NAC3/ANAC055, WRKY51,  
200 ZAT10) (Lorenzo et al., 2003, Pre et al., 2008, Bu et al., 2008, Gao et al., 2011, Pauwels and  
201 Goossens, 2008). These TFs formed a highly connected network, with all TFs except DREB2B  
202 targeting at least two TFs in the network and being themselves targeted by two TFs (Fig. 2e and  
203 Supplementary Table 6). Auto-regulation was common, with seven TFs targeting their own loci  
204 (Fig. 2e). The target genes of ZAT10, ANAC055 and ATAF2 were most similar to those of MYC2/3  
205 (Fig. 2f). Consistent with this, their target genes shared several significantly enriched gene



206 ontology terms (adjusted  $p < 0.05$ ), suggesting related functions in jasmonate signaling  
207 (Supplementary Fig. 2d). ORA59 and ERF1, along with DREB2B, formed a distinct group that  
208 targeted a related set of genes (Supplementary Fig. 3a). Notably, ERF1 and ORA59 also shared  
209 significant enrichment of a separate set of gene ontology terms with one-another, but that were  
210 not enriched amongst MYC2/3 targets. This is consistent with the joint role of ERF1 and ORA59  
211 in controlling a pathogen defense arm of JA signaling (Pre et al., 2008, Lorenzo et al., 2003). No  
212 gene ontology terms were enriched amongst the targets of DREB2B. WRKY51 and RVE2 had  
213 relatively few enriched gene ontology terms but shared most of these with one-another. Most of  
214 the terms related to anti-insect defense and were a subset of the enriched MYC2/3-ZAT10-  
215 ANAC055-ATAF2 gene ontology terms (Supplementary Fig. 2a). ZAT10 and ANAC055 are  
216 known regulators of anti-insect defense and our results suggest WRKY51 and RVE2 may also be  
217 involved in this component of jasmonate responses (Schweizer et al., 2013a). Taken together,  
218 our analyses determine that MYC2 and MYC3 shape the dynamic spatiotemporal JA response  
219 through the activation of a large TF network that includes various potentially coupled feedforward  
220 and feedback loops and that allows extensive cross-communication with other signaling  
221 pathways.

## 222 **MYC2 controls JA-induced epigenomic reprogramming**

223 Reprogramming of the epigenome is an integral part of development and environmental stimulus-  
224 induced gene expression (Feng et al., 2010, Xiao et al., 2017). For example, activation of the  
225 transcriptional JA response requires the formation of MYC2/MED25-mediated chromatin looping  
226 (Wang et al., 2019). To investigate the extent of JA-induced changes in chromatin architecture  
227 and the regulatory importance of MYC2 in this response, we conducted ChIP-seq assays to profile  
228 the genome wide occupancy of the histone modification H3K4me3 and the histone variant H2A.Z  
229 in untreated/JA-treated (4 h) Col-0 and *myc2* seedlings. Trimethylation of H3K4me3 marks active  
230 and poised genes and the histone variant H2A.Z confers gene responsiveness to environmental  
231 stimuli (Rothbart and Strahl, 2014, Coleman-Derr and Zilberman, 2012). mRNA expression was

232 monitored in parallel using RNA-seq. JA treatment led to a reprogrammed chromatin landscape  
233 with several thousand differentially enriched H3K4me3 and H2A.Z domains (Supplementary Fig.  
234 4a, b, c and Supplementary Table 7). We identified 826 differentially expressed genes (675  
235 induced, 151 repressed; Col-0 control v. JA-treated) in that experiment and, as expected, the JA-  
236 induced genes had a stronger promoter enrichment of MYC2 than the JA-repressed genes (Fig.  
237 3a and Supplementary Table 2). The JA-induced genes had an increase of H3K4me3, whereas  
238 JA-repressed genes had no dynamic change in the level of H3K4me3 (Fig. 3b, d). Strikingly, *myc2*  
239 mutants only display a compromised increase of H3K4me3 after JA treatment suggesting that the  
240 JA-induced trimethylation of H3K4me3 strongly depends on prior MYC2 binding (Fig. 3b, c, d and  
241 Supplementary Fig. 4a). This scenario is illustrated by two JA-induced genes, *JAZ2* and *GRX480*,  
242 which are directly targeted by MYC2. Their expression depends on MYC2 and their JA-induced  
243 increase of gene body-localized H3K4me3 partially depends on MYC2 (Fig. 3d and  
244 Supplementary Fig. 4d). In contrast, JA-induced changes in H2A.Z occupancy are not affected in  
245 *myc2* mutants (Supplementary Fig. 4a) suggesting that JA-induced H2A.Z dynamics are either  
246 independent of MYC2 or other MYCs such as MYC3, MYC4 and MYC5 are functionally redundant  
247 in regulating H2A.Z dynamics.

248 **Extensive remodelling of the (phospho)proteome occurs following a JA stimulus and may**  
249 **drive alternative splicing**

250 We next explored how JA remodels the proteome and phosphoproteome of etiolated seedlings.  
251 Hormone signal transduction typically modifies phosphorylation of downstream proteins,  
252 changing their activity independent of transcript abundance (Wang et al., 2015). Transcript  
253 abundances are also frequently weakly correlated with protein abundances (Walley et al., 2016,  
254 Baerenfaller et al., 2008). Consequently, proteomic and phosphoproteomic analyses yield  
255 additional insight into gene regulatory networks. We determined that the loss of MYC2 caused  
256 substantial changes to the JA-responsive proteome and phosphoproteome; 1,432 proteins and

257 939 phosphopeptides (corresponding to 567 genes) were significantly differentially abundant in  
258 Col-0 seedlings relative to *myc2* seedlings after 2 h JA treatment ( $q < 0.01$ ; Fig. 4a and  
259 Supplementary Table 8, 9). Col-0 seedlings responded to JA (161 proteins, 443 phosphopeptides,  
260 Col-0 JA v. Col-0 air) and the response was smaller without functional MYC2 (79 proteins, 93  
261 phosphopeptides, *myc2* JA v. *myc2* air). Some overlap existed between proteins or  
262 phosphopeptides and transcripts responsive to JA treatment (Fig. 4b). Both transcripts and  
263 proteins encoded by 28 genes were differentially expressed in JA-treated Col-0 seedlings relative  
264 to air controls. A further 33 differentially expressed proteins in JA-treated Col-0 seedlings had no  
265 corresponding differentially expressed transcript but were encoded by genes that are targeted by  
266 MYC2 and MYC3. Differentially abundant phosphopeptides were detected that corresponded with  
267 15 differentially expressed transcripts. Transcript and protein abundances also correlated poorly  
268 in JA-treated Col-0 seedlings (Fig. 4c), in agreement with prior studies (Walley et al., 2016,  
269 Baerenfaller et al., 2008). The protein of only one known JA pathway component was differentially  
270 abundant in JA-treated Col-0 seedlings relative to controls, and none were differentially  
271 phosphorylated. In sum, these data indicate that the JA-responsive proteome and  
272 phosphoproteome are poorly annotated and are not well represented by transcriptome studies  
273 (Fig. 4c).

274           Alternative splicing can occur rapidly in response to environmental stimuli,  
275 contributing to transcriptome reprogramming and potentially fine-tuning physiological responses  
276 (Hartmann et al., 2016, Calixto et al., 2018). It is central to JA-mediated regulation of transcription,  
277 with an alternative isoform of the repressor JAZ10 creating a negative feedback loop that  
278 desensitizes cells to a JA stimulus (Moreno et al., 2013, Zhang et al., 2017, Chung et al., 2010).  
279 However, the extent of alternative splicing in JA signaling beyond the JAZ repressors is poorly  
280 characterized. We observed that phosphorylation of proteins involved in RNA recognition and  
281 nucleotide binding was disrupted in JA-treated *myc2* mutants compared with Col-0 seedlings. The  
282 spliceosome was the only pathway significantly enriched amongst these differentially

283 phosphorylated proteins ( $p < 0.05$ , 18 genes matched) suggesting that MYC2 may influence JA-  
284 responsive alternative splicing. We examined isoform switching events across our JA  
285 transcriptome time-series, where the most abundant of two isoforms from a single gene changes,  
286 to determine the extent of JA-responsive alternative splicing (Fig. 4d, e, Supplementary Table  
287 10). There were 151 switch events, corresponding to 137 isoform pairs from 120 genes, within 24  
288 h of JA treatment. These were identified from 30,547 total individual transcripts detected (average  
289 TPM>1; Supplementary Table 11). Two of the genes exhibiting isoform switches had prior JA  
290 annotations (*RVE8/AT3G09600*, *SEN1/AT4G35770*) and others were annotated to a variety of  
291 processes (including auxin, ABA, light signaling, disease response, amongst many others), but  
292 there was no significant enrichment of any gene ontology terms or pathways. This indicates that  
293 MYC2 influences alternative splicing that diversifies the transcriptome in response to a JA  
294 stimulus.

### 295 **Multi-omic modelling provides a comprehensive understanding of the JA response** 296 **genome regulatory program**

297 We wanted next to characterize the broader JA-response genome regulatory program so that we  
298 could increase our understanding of the roles of known JA TFs within this and identify new  
299 potential regulatory interactions. To do so we generated a gene regulatory network model  
300 encompassing the (phospho)proteomic and time-series transcriptomic data (Supplementary Fig.  
301 5a and Supplementary Table 12). Many known JA signaling components were present in the 100  
302 most important predicted components of the model (MYC2, ERF1, JAZ1, JAZ2, JAZ5, JAZ10,  
303 ATAF2 and others; within top 100 of 4366 components by normalized motif score; Supplementary  
304 Table 12). MYC2 was predicted to regulate a subnetwork of 26 components, 23 of which were  
305 validated as directly bound by MYC2 in ChIP-seq assays (88.5%, Supplementary Fig. 6a and  
306 Supplementary Table 1, 12). We further validated the network by comparing the ChIP/DAP-seq  
307 data previously collected for the remaining 12 JA TFs to their targets in the gene regulatory

308 network (Fig. 2, Supplementary Fig. 6b and Supplementary Table 13). The gene regulatory  
309 network identified all of these TFs as components of the JA response, except MYC3  
310 (Supplementary Table 12). It is likely that MYC3 was not part of the network due to it being only  
311 modestly differentially expressed following JA treatment and not being detected in the  
312 (phospho)proteome analyses (Supplementary Tables 2, 8, 9). The wider validation of targets was  
313 less strong than for MYC2, ranging from 0% to 33.3%. This could reflect the possibility that  
314 interactions predicted by the gene regulatory network may not identify all intermediate  
315 components. Lastly, we examined known genetic interactions. The MYC2 subnetwork included  
316 activation of JAZ10 within 0.5 h of a JA stimulus, with JAZ10 reciprocally repressing MYC2  
317 (Supplementary Fig. 6a, b). This is consistent with the known role of JAZ10 in establishing  
318 negative feedback that attenuates JA signaling (Moreno et al., 2013). MYC2 was also predicted  
319 to activate AIB (JAM1/bHLH017/AT2G46510) (Supplementary Fig. 6a, b), establishing a negative  
320 feedback loop in which AIB negatively regulates MYC2. This is consistent with prior studies, which  
321 established AIB is dependent upon and antagonistic to MYC2, thereby repressing JA signaling  
322 (Nakata et al., 2013, Sasaki-Sekimoto et al., 2013, Fonseca et al., 2014). Confirmation by both  
323 genetic data from the literature and our DAP/ChIP-seq experiments indicates that our gene  
324 regulatory network modelling approach is a useful tool to identify new regulatory interactions  
325 within JA signaling and to better understand known regulatory interactions.

326 Crosstalk between hormone response pathways permits fine-tuning of plant growth  
327 and development in response to diverse environmental signals (Karasov et al., 2017). We  
328 examined the potential points at which MYC2 may interface directly with other hormone signaling  
329 pathways, since MYC2 is the master regulator of JA responses and one of the first TFs activated  
330 by JA. The MYC2 subnetwork identified a potential route for JA signaling to cross-regulate auxin  
331 hormone signaling. MYC2 activated ARF18 and ARF18 reciprocally activated MYC2  
332 (Supplementary Fig. 6a and Supplementary Table 12). It also indicated that MYC2 may promote  
333 ethylene signaling by activating MAP kinase kinase 9 (MKK9) (Supplementary Fig. 6a). Prior

334 genetic studies determined that MKK9 induces ethylene production, but had not examined a  
335 possible link with JA signaling (Xu et al., 2008). Positive crosstalk is known to exist between JA  
336 and auxin signaling though the mechanism is not clearly determined (An et al., 2010, Hentrich et  
337 al., 2013). RGL3, a regulator of gibberellic acid (GA) signaling previously associated with JA-GA  
338 crosstalk, was also present within the MYC2 subnetwork (Supplementary Fig. 6a), predicted to  
339 inhibit MYC2 but not to be reciprocally regulated by MYC2 (Wild et al., 2012). These three  
340 interactions are potential points at which crosstalk can occur rapidly during a JA response with  
341 auxin, gibberellin and ethylene.

342 We next examined the broader gene regulatory network to identify additional  
343 predicted points of crosstalk between JA and other signaling pathways. The model predicted that  
344 STZ/ZAT10 is a key early hub through which JA signaling is prioritized over several other hormone  
345 and stress response pathways (Fig. 5a and Supplementary Table 12). STZ/ZAT10 is known to be  
346 a transcriptional repressor from genetic studies (Mittler et al., 2006) and, consistent with this, our  
347 model predicted that it inhibited the majority of genes it regulates (25 of 34 genes). *WRKY40*,  
348 *WRKY70*, *DDF* and *ERF6* were all predicted to be inhibited by STZ/ZAT10 within 0.25 h of a JA  
349 stimulus and *GRX480* within 1 h. Direct binding of STZ/ZAT10 to *ERF6* was detected in ChIP-seq  
350 assays (Supplementary Table 6). *WRKY40* and *WRKY70* both are both early brassinosteroid  
351 response components that repress defense responses (Lozano-Duran et al., 2013). *WRKY70*  
352 also fine-tunes the crosstalk between the salicylic acid and JA pathways (Li et al., 2006). *DDF1*  
353 promotes resistance to drought, cold, heat and salinity stress by reducing endogenous gibberellin  
354 abundance (Kang et al., 2011, Magome et al., 2008). *ERF6* similarly promotes drought resistance  
355 by reducing gibberellin abundance (Dubois et al., 2015). *GRX480* regulates the negative crosstalk  
356 between salicylic acid and both JA/ethylene signaling through the direct interactions with TGA  
357 transcription factors (Zander et al., 2012, Ndamukong et al., 2007). The model also predicts that  
358 *ERF6*, *WRKY70* and *DDF1* exert negative feedback on STZ/ZAT10 by activating *JAZ8* within 0.25  
359 h of the JA stimulus (Fig. 5a and Supplementary Table 12). *JAZ8* is a known repressor of JA

360 signaling and is predicted to repress STZ/ZAT10 (Shyu et al., 2012). In sum the gene regulatory  
361 network predicts that STZ/ZAT10 is an important hub for JA signaling to be prioritized over other  
362 hormone and stress response pathways (Fig. 5a).

363 **Phenotypic screening guided by large-scale data identifies new JA signaling components**  
364 **and validates the JA gene regulatory network**

365 We next utilized our regulatory network and large-scale datasets to identify novel regulators of  
366 the JA pathway using the JA root growth inhibition assay as our experimental readout. First, we  
367 focused on ABO3 (ABA overly sensitive 3), which is directly targeted by MYC2 and MYC3 (Fig.  
368 2d and Supplementary Table 1) and whose subnetwork is comprised of 26 predicted regulated  
369 genes, the majority of which is positively regulated (22 of 26 genes) (Fig. 5b). ABO3 encodes the  
370 *Arabidopsis* WRKY transcription factor gene WRKY63, which is involved in stress gene  
371 expression and drought tolerance (Ren et al., 2010, Van Aken et al., 2013). To investigate the  
372 importance of the ABO3 subnetwork in JA signaling, we tested *abo3* T-DNA mutant seedlings  
373 (SALK\_075986C) in a JA-induced root growth inhibition assay. We found that *abo3* mutants show  
374 a weak JA hypo-sensitive root growth inhibition phenotype (Fig. 5c-e) indicating that ABO3 is  
375 positive regulator of JA signaling and that our network approach is able to identify new pathway  
376 components.

377 Next, we expanded our phenotyping analysis to T-DNA lines of genes that display the  
378 strongest binding of MYC2 and MYC3 in their promoters (Supplementary Table 1, 13). The  
379 rationale behind this approach is that master TFs target the majority of key signaling components  
380 in their regulated respective pathways and that these are often the most strongly bound targets  
381 (Chang et al., 2013, Song et al., 2016, Xie et al., 2018). Of 99 genes tested (194 T-DNA lines in  
382 total, Supplementary Table 14), we discovered six genes, when mutated, display mild JA root  
383 growth phenotypes (Supplementary Fig. 7a and Supplementary Table 14). Mild phenotypes as  
384 well as their low frequency were not surprising since gene redundancy is very common in the

385 *Arabidopsis* genome and even the mutation of the master TF MYC2 only causes a mild JA-  
386 hyposensitive root growth phenotype (Fig. 5c-e) (Lorenzo et al., 2004, 2000). Among these genes  
387 was the cytochrome P450 enzyme *CYP708A2* gene from which both tested T-DNA mutant alleles  
388 exhibit a JA hypersensitive root phenotype (Fig. 5f-h). Interestingly, our network analysis also  
389 discovered *CYP708A2* as a regulatory hub (Supplementary Fig. 5a, 7b). *CYP708A2* is involved  
390 in the triterpene synthesis which is known to be stimulated by methyl jasmonate (Field and  
391 Osbourn, 2008, Mangas et al., 2006); future studies are however needed to further decipher the  
392 role of *CYP708A2* in JA signaling. Another interesting uncharacterized gene that we discovered  
393 caused a JA phenotype is a Sec14p-like phosphatidylinositol transfer family protein (*AT5G47730*)  
394 (Supplementary Fig. 7a and Supplementary Table 14). Phosphatidylinositol transfer proteins  
395 (PITPs) are crucial for the phosphatidylinositol homeostasis in plants (Huang et al., 2016) and  
396 inositol polyphosphates have been implicated in COI1-mediated JA perception (Mosblech et al.,  
397 2011). Taken together, these data show that our multi-omic approach goes beyond network  
398 description ultimately enabling the identification of novel JA pathway regulators.

## 399 **Discussion**

400 An important unanswered question in plant biology is how multiple signaling pathways interact to  
401 coordinate control of growth and development. In this study we have comprehensively  
402 characterized the cellular response to the plant hormone JA and generated a network-level  
403 understanding of the MYC2/MYC3-regulated JA signaling pathway. We used this to identify  
404 several new points at which JA signaling may have cross-regulation with other hormone and  
405 stress response pathways in order to prioritize itself. The results increase knowledge of how JA  
406 functions in the etiolated seedling, a less well characterized model for JA responses. Moreover,  
407 the general principles described here provide a framework for analysis of cross-regulation  
408 between hormone and stress signaling pathways. We provide our data in a web-based genome



409 and network browsers to encourage deeper exploration  
410 (<http://signal.salk.edu/interactome/JA.php>, <http://neomorph.salk.edu/MYC2>).

411 The major insight provided by our study is that multiple points of crosstalk are likely to  
412 exist between JA signaling and other pathways. This was evident from the interactions within the  
413 genome regulatory network model and supported by our observation that many (37 to 59%) genes  
414 from other hormone signaling pathways are bound by MYC2/3 and JA-regulated. The WRKY  
415 family TF ABO3 was identified as a candidate JA response regulator and genetic analyses  
416 determined a mutant of the gene was JA hyposensitive. ABO3 is also a regulator of ABA  
417 responses (Ren et al., 2010) suggesting that ABO3 functions in the cross-communication  
418 between the JA and ABA pathway. The repressive zinc-finger family TF STZ/ZAT10, working with  
419 JAZ8, emerged as a potentially important point of contact with salt and drought stress, as well as  
420 the salicylic acid, brassinosteroid and gibberellin hormone signaling pathways. Combined these  
421 results illustrate the importance of transcriptional cross-regulation during a JA response in  
422 modulating the correct cellular output for the stimuli a plant perceives.

423 Our multi-omic analysis determined that the master TF MYC2 and its relative MYC3  
424 directly target thousands of JA responsive genes including hundreds of JA responsive TFs,  
425 thereby enabling a robust cascade of transcriptional reprogramming. Secondary TFs downstream  
426 of MYC2/3 directly targeted overlapping but distinct cohorts of genes, indicating they have distinct  
427 roles within the JA response. This illustrates the complexity of hormone-response genome  
428 regulatory programs; we have assayed only a fraction of the JA-responsive TFs and find that any  
429 individual JA-responsive gene may be bound by multiple TFs. How the final quantitative output of  
430 any individual gene is determined by combinatorial binding of TFs remains a major challenge to  
431 address. We further demonstrated the importance of MYC2/3 target genes in JA responses by  
432 analyzing JA root growth phenotypes in mutants of 99 genes strongly targeted by MYC2/3.  
433 Mutations in seven genes caused clear disruption of JA responses, both hyper and hypo-

434 sensitivity. It is probable that genetic redundancy accounts for a proportion of the mutants not  
435 causing phenotype changes.

436 Another layer of regulatory complexity within the JA signaling pathway, and within  
437 signaling pathways in general, is the presence of multiple feedforward and feedback loops that  
438 are activated simultaneously. The interactions between these subnetworks through their kinetics  
439 and the strength of their regulatory impact on the broader network is not well understood. For  
440 example, we discovered that MYC2 and MYC3 stimulate JA biosynthesis but also target the entire  
441 JAZ repressor family from which the majority of members is also transcriptionally activated.  
442 Uncoupling these subnetworks would be an effective way to determine how they interact to drive  
443 very robust activation of the JA pathway. The combination of our multi-omic framework approach  
444 coupled with powerful genetic approaches such as the generation of the *jaz* decouple mutant (Guo  
445 et al., 2018) should significantly contribute to a better understanding of JA response pathways

446

447 **Acknowledgements:** We thank several postdocs, undergrads and technicians who contributed  
448 technical assistance to the project; Mingtang Xie, Liang Song, Raul Carlos Serrano, Candice Sy,  
449 Lourdes Tames, Julie Park, Omar Romero, Raymond Luong, Waina Ho, Yusuke Koga, Sasha  
450 Hazelton, Mark Urich, Tsegaye Dabi. We thank Shao-shan Carol Huang for computational  
451 assistance and James Moresco and Jolene Diedrich for proteomics support.

452 **Funding:** M.Z. was supported by a Deutsche Forschungsgemeinschaft (DFG) research  
453 fellowship (Za-730/1-1) and also by the Salk Pioneer Postdoctoral Endowment Fund. M.G.L. was  
454 supported by an EU Marie Curie FP7 International Outgoing Fellowship (252475). In addition, this  
455 work was supported by the Mass Spectrometry Core of the Salk Institute with funding from NIH-  
456 NCI CCSG (P30 014195) and the Helmsley Center for Genomic Medicine. This work was  
457 supported by grants from the National Science Foundation (NSF) (MCB-1818160 and IOS-  
458 1759023 to J.W.W, MCB-1024999 to J.R.E), the National Institutes of Health (R01GM120316),

459 the Division of Chemical Sciences, Geosciences, and Biosciences, Office of Basic Energy  
460 Sciences of the U.S. Department of Energy (DE-FG02-04ER15517) and the Gordon and Betty  
461 Moore Foundation (GBMF3034). Research in R.S. lab was supported by grant BIO2016-77216-  
462 R (MINECO/FEDER) from the Ministry of Economy, Industry and Competitiveness. J.W.W. is  
463 supported as a Faculty Scholar of the ISU Plant Sciences Institute. J.R.E. is an Investigator of the  
464 Howard Hughes Medical Institute.

465 **Contributions:** M.Z., M.G.L., R.S. and J.R.E. designed the research. M.Z., M.G.L., A.E.L. and  
466 B.J. performed the phenotype screening. M.Z., M.G.L. and J.P.S.G. carried out the RNA-seq and  
467 ChIP-seq experiments. M.G.L., E.H. and J.P.S.G. performed the cloning and generation of  
468 transgenic constructs. M.G.L., J.R.N., H.C, M.Z. and L.Y. analyzed the sequencing data and  
469 performed bioinformatics analyses. A.B. carried out DAP-seq experiments. N.M.C. and J.W.W.  
470 analyzed the proteome and phosphoproteome data. N.M.C., J.W.W., A.W., S.J. and Z. B-J.  
471 performed regulatory network analyses. M.Z., M.G.L and J.R.E. prepared the figures and wrote  
472 the manuscript.

473 **Competing interests:** Authors declare no competing interests.

474 **Data and material availability:** All described lines can be requested from the corresponding  
475 author. Sequence data can be downloaded from GEO (GSE133408). Proteomics data are  
476 deposited at Proteome Exchange under the accession ID PXD013592. Visualized data can be  
477 found under <http://neomorph.salk.edu/MYC2> and <http://signal.salk.edu/interactome/JA.php>.

478

479

480

481

## 482 **Material & Methods**

### 483 **Plant material and growth conditions**

484 The *myc2* mutant in this study is *jin1-8* (SALK\_061267) (Lorenzo et al., 2004) and was obtained  
485 from the Arabidopsis Biological Resource Center (ABRC). Col-0 *MYC2::MYC2-Ypet* and Col-0  
486 *MYC3::MYC3-Ypet*, generated by recombineering, have been described previously (Zhou et al.,  
487 2011). For the generation of all large scale datasets, three-day-old etiolated seedlings were used  
488 (Col-0, *myc2*, *MYC2::MYC2-Ypet*, *MYC3::MYC3-Ypet*). Gaseous MeJA treatment for the  
489 respective times was performed as previously described (Schweizer et al., 2013b). For the JA-  
490 induced root growth inhibition assay, surface-sterilized Col-0, *myc2* and T-DNA mutant seeds  
491 (Supplementary Table 13) were grown on agar plates containing LS medium supplemented with  
492 or without 50  $\mu$ M MeJA (392707, Millipore Sigma) for 9 days. Plates were scanned afterwards  
493 and root length was measured using ImageJ.

### 494 **ChIP-seq**

495 Three-day-old etiolated Col-0 *MYC2::MYC2-Ypet*, Col-0 *MYC3::MYC3-Ypet*, Col-0 and *myc2*  
496 seedlings were used for ChIP-seq experiments. ChIP assays were performed as previously  
497 described (Kaufmann et al., 2010). ChIP-seq assays were conducted with antibodies against  
498 H2A.Z (39647, Active Motif), H3K4me3 (04-745, Millipore Sigma) and GFP (11814460001,  
499 Millipore Sigma or goat anti-GFP supplied by David Dreschel, Max Planck Institute of Molecular  
500 Cell Biology and Genetics). As a negative control, mouse or goat IgG (015-000-003 or 005-000-  
501 003, Jackson ImmunoResearch) was used. The respective antibodies or IgG were coupled for 4-  
502 6 hour to Protein G Dynabeads (50 $\mu$ l, 10004D, Thermo Fisher Scientific) and subsequently  
503 incubated overnight with equal amounts of sonicated chromatin. Beads were washed twice with  
504 high salt buffer (50 mM Tris HCl pH 7.4, 150 mM NaCl, 2 mM EDTA, 0.5% Triton X-100) low salt  
505 (50 mM Tris HCl pH 7.4, 500 mM NaCl, 2 mM EDTA, 0.5% Triton X-100) and wash buffer (50 mM  
506 Tris HCl pH 7.4, 50 mM NaCl, 2 mM EDTA) before samples were de-crosslinked, digested with

507 proteinase K and DNA was precipitated. Sequencing libraries were generated following the  
508 manufacturer's instructions (Illumina). Libraries were sequenced on the Illumina HiSeq 2500 and  
509 HiSeq 4000 Sequencing system and sequencing reads were aligned to the TAIR10 genome  
510 assembly using Bowtie2 (Langmead, 2010).

#### 511 **DAP-seq**

512 DAP-seq assays were carried as previously described (O'malley et al., 2016) using recombinantly  
513 expressed ERF1 (AT3G23240, ERF1B, AtERF092), ORA59 (AT1G06160), ATAF1  
514 (AT1G01720), DREB2B (AT3G11020), ZAT18 (AT3G53600), RVE2 (AT5G37260), WRKY51  
515 (AT5G64810), HY5 (AT5G11260) and TCP23 (AT1G35560).

#### 516 **RNA-seq**

517 Three-day-old etiolated seedlings were used for expression analyses. Total RNA was extracted  
518 with the RNeasy Plant Mini Kit (74903, Qiagen). cDNA library preparation and subsequent single  
519 read sequencing was carried as previously described (Song et al., 2016).

#### 520 **RNA-seq analyses**

521 Sequencing reads were quality trimmed using TrimGalore 0.4.5  
522 (<https://github.com/FelixKrueger/TrimGalore>) then aligned to the TAIR10 genome assembly using  
523 TopHat 2.1.1 (Kim et al., 2013). Reads within gene models were counted using HTSeq (Anders  
524 et al., 2015). Differentially expressed genes in time series RNA-seq were identified using EdgeR  
525 3.6.2 with a likelihood ratio test (functions glmFit and glmLRT), batch correction Benjamini &  
526 Hochberg correction for multiple tests (Robinson et al., 2010). Differentially expressed genes in  
527 the Col-0 *versus myc2* mutant RNA-seq were determined using EdgeR 3.18.1 and quasi-  
528 likelihood F-tests (function glmQLFit) (Lun et al., 2016). Temporal co-regulation of transcripts was  
529 determined using the Short Time-Series Expression Miner (Ernst and Bar-Joseph, 2006). Known  
530 *A. thaliana* TFs were identified by reference to PlantTFDB 4.0 (Jin et al., 2017).

531

## 532 **ChIP-seq and DAP-seq analyses**

533 ChIP-seq and DAP-seq sequence reads were mapped to the TAIR10 reference genome using  
534 Bowtie 2 v.2-2.0.5 with default parameters (Langmead and Salzberg, 2012). For TF ChIP-seq,  
535 enriched binding sites were identified using MACS2 v.2.1 (options -p 99e-2 --nomodel --shiftsize  
536 --down-sample --call-summits) against sequence reads from whole IgG control samples (Zhang  
537 et al., 2008). The shift size was calculated using PhantomPeakQualTools v.2.0 (Kharchenko et  
538 al., 2008). Subsequent analyses used summits only. Summit lists were filtered with a lower cut-  
539 off of  $-\log_{10}(25)$  and remaining summits expanded from single nucleotides to 150 nt. Only  
540 summits with at least 10% nt overlap between at least two biological replicates were retained.  
541 These overlapping summits were merged between replicates using BEDtools v.2.17.0 to give the  
542 final set of high-stringency summits, which were then annotated using ChIPpeakAnno v.2.2.0 to  
543 any gene within 500 nt of the center of the summit or, alternatively, the nearest neighbor if there  
544 was no gene within 500 nt (Quinlan and Hall, 2010, Zhu et al., 2010). Venn diagrams were drawn  
545 using Venny and Intervene (<http://bioinfogp.cnb.csic.es/tools/venny/>) (Khan and Mathelier, 2017).  
546 Top-ranked MYC2/3 binding sites were identified by applying IDR to the summits from the two  
547 biological replicates that had the greatest number of summits above the MACS2 lower cut-off of  
548  $-\log_{10}(25)$ . TF binding motifs were determined using the MEME-ChIP webserver with default  
549 parameters on the sequences of the high-stringency summits (Machanick and Bailey, 2011). The  
550 Genome wide Event finding and Motif discovery (GEM) tool (Guo et al., 2012) was used to identify  
551 the target summits in DAP-seq data. Significant enrichments of histone modifications and histone  
552 variants were identified with the SICER software (Zang et al., 2009) using the TAIR10 genome  
553 assembly. The Intersect tool from BEDtools (Quinlan and Hall, 2010) was used to identify the  
554 genes in the ChIP-seq datasets that are most proximal to the discovered binding sites. For both  
555 ChIP-seq and DAP-seq gene ontology enrichment was assessed using clusterProfiler (Yu et al.,  
556 2012).

557

558 **Mass spectrometry analysis**

559 Ground untreated/JA-treated Col-0 and *myc2* seedlings tissue was ground and lysed in  
560 YeastBuster (71186, Millipore Sigma). Proteins (100 µg per sample) were precipitated using  
561 methanol- chloroform. Dried pellets were dissolved in 8 M urea, 100 mM triethylammonium  
562 bicarbonate (TEAB), reduced with 5 mM tris (2-carboxyethyl) phosphine hydrochloride (TCEP),  
563 and alkylated with 50 mM chloroacetamide. Proteins were then trypsin digested overnight at 37  
564 °C. The digested peptides were labeled with TMT10plex™ Isobaric Label Reagent Set (90309,  
565 Thermo Fisher Scientific, lot TE264412) and combined. One hundred micrograms (the pre-  
566 enriched sample) was fractionated by basic reverse phase (84868, Thermo Fisher Scientific).  
567 Phospho-peptides were enriched from the remaining sample (900 µg) using High-Select Fe-NTA  
568 Phospho-peptide Enrichment Kit (A32992, Thermo Fisher Scientific). The TMT labeled samples  
569 were analyzed on a Fusion Lumos mass spectrometer (Thermo Fisher Scientific). Samples were  
570 injected directly onto a 25 cm, 100 µm ID column packed with BEH 1.7 µm C18 resin (186002350,  
571 Waters) and subsequently separated at a flow rate of 300 nL/min on a nLC 1200 (LC140, Thermo  
572 Fisher Scientific). Buffer A and B were 0.1% formic acid in water and 90% acetonitrile,  
573 respectively. A gradient of 1–20% B over 180 min, an increase to 40% B over 30 min, an increase  
574 to 100% B over another 20 min and held at 90% B for a final 10 min of washing was used for 240  
575 min total run time. Column was re-equilibrated with 20 µL of buffer A prior to the injection of  
576 sample. Peptides were eluted directly from the tip of the column and Nano sprayed directly into  
577 the mass spectrometer by application of 2.8 kV voltage at the back of the column. The Lumos  
578 was operated in a data dependent mode. Full MS1 scans were collected in the Orbitrap at 120000  
579 resolution. The cycle time was set to 3 s, and within this 3 s the most abundant ions per scan  
580 were selected for CID MS/MS in the ion trap. MS3 analysis with multinotch isolation (SPS3) was  
581 utilized for detection of TMT reporter ions at 60000 resolution. Monoisotopic precursor selection  
582 was enabled and dynamic exclusion was used with exclusion duration of 10 s.

583 The raw data were analyzed using MaxQuant version 1.6.3.3 (Tyanova et al., 2016). Spectra  
584 were searched, using the Andromeda search engine (Cox et al., 2011) against the Tair10  
585 proteome file entitled “TAIR10\_pep\_20101214” that was downloaded from the TAIR website  
586 ([https://www.arabidopsis.org/download/indexauto.jsp?dir=%2Fdownload\\_files%2FProteins%2FTAIR10\\_protein\\_lists](https://www.arabidopsis.org/download/indexauto.jsp?dir=%2Fdownload_files%2FProteins%2FTAIR10_protein_lists)) and was complemented with reverse decoy sequences and common  
587 contaminants by MaxQuant. Carbamidomethyl cysteine was set as a fixed modification while  
588 methionine oxidation and protein N-terminal acetylation were set as variable modifications. For  
589 the phosphoproteome “Phosho STY” was also set as a variable modification. The sample type was  
590 set to “Reporter Ion MS3” with “10plex TMT selected for both lysine and N-termini”. Digestion  
591 parameters were set to “specific” and “Trypsin/P;LysC”. Up to two missed cleavages were  
592 allowed. A false discovery rate, calculated in MaxQuant using a target-decoy strategy (Elias and  
593 Gygi, 2010) less than 0.01 at both the peptide spectral match and protein identification level was  
594 required. The ‘second peptide’ option identify co-fragmented peptides was not used. Differentially  
595 expressed proteins and phospho-sites were identified using PoissonSeq (Li et al, 2012) with a q-  
596 value cutoff of 0.1. Sample loading normalization was performed before differential expression  
597 analysis.

### 599 **Transcript quantification and identification of isoform switches**

600 Quantification of transcripts was performed using Salmon v0.8.1 in conjunction with the AtRTD2-  
601 QUASI transcript reference (Patro et al., 2017, Zhang et al., 2015b) The quasi mapping-based  
602 index was built using an auxiliary k-mer hash over k-mers of length 31 (k=31). For quantification,  
603 all parameters of Salmon were kept at default, except that the option to correct for the fragment-  
604 level GC biases (“-gcBias”) was turned on.

605 The TSIS R package, which is designed for detecting alternatively spliced isoform switch  
606 events in time-series transcriptome data, was used to perform the isoform switch analysis (Guo  
607 et al., 2017) Only transcripts whose average transcript per million (TPM) across all time points  
608 was >1 were included in the TSIS analysis. The mean expression approach was used to search



609 interaction points. Significant switch events were identified using the following filtering  
610 parameters: (1) probability cutoff  $>0.5$ ; (2) differences cutoff  $>1$ ; (3) p-value cutoff  $< 0.05$ ; (4) min

### 611 **Gene regulatory network (GRN) inference**

612 All GRNs were constructed using the Regression Tree Pipeline for Spatial, Temporal, and  
613 Replicate data (RTP-STAR) (Shibata et al., 2018) Clark et al., 2018). Prior to GRN inference,  
614 genes were clustered based on transcriptome, proteome, or phosphoproteome data using  
615 Dynamic Time Warping (DTW) (and the dtwclust package in R (Giorgino 2009)). These clusters  
616 were then used in the RTP-STAR pipeline. For the transcriptome networks, one network was  
617 inferred for genes differentially expressed at each time point (8 networks total), and then the  
618 networks were combined in a union. For each network, the biological replicates for that individual  
619 time point and the 0 h (control) time point were used to infer the network. The sign  
620 (activation/repression) of each edge was inferred using all of the time points in the time course.

621 For the proteome and phosphoproteome networks, one network was inferred for genes  
622 differentially expressed in any of the comparisons. The biological replicates for all of the (phospho)  
623 proteome samples were used to infer the network. The sign of each edge was not inferred as the  
624 (phospho) proteome data only consisted of one time point.

625 After the transcriptome, proteome, and phosphoproteome networks were combined in a union, a  
626 Network Motif Score (NMS; Clark et al., 2018) was calculated to determine the importance of  
627 each gene. Feedback loop, feed-forward loop, bi-fan, and diamond motifs were used in this score  
628 as they have been previously shown to contain genes important for biological processes (Alon,  
629 2007, Milo et al., 2002, Ingram et al., 2006). All motifs were significantly enriched in the combined  
630 network compared to a randomly generated network of the same size. The number of times each  
631 gene appeared in each motif was counted, the counts were normalized to a scale of 0 to 1, and  
632 the counts were summed to calculate the NMS. The higher the NMS, the more functionally  
633 important the gene is. All code for RTP-STAR is available at <https://github.com/nmclark2/RTP->

634 STAR. The parameters used for all networks in this paper are provided in Supplementary Table  
635 15.

## 636 **Figure legends**

### 637 **Figure 1. Design of our study and key datasets utilized.**

638 **a, b**, Overview of profiled regulatory layers (a) and detailed description of collected samples (b).  
639 **c**, AnnoJ genome browser screenshot visualizes the binding of MYC2 and MYC3 to the three  
640 example genes (*IAR3/UR3*, *ACT1*, *JAZ9/TIFY7*). MYC2/3 binding was determined with ChIP-seq  
641 using JA-treated (2 hours) Col-0 *MYC2::MYC2-Ypet* and Col-0 *MYC3::MYC3-Ypet* seedlings.  
642 Three independent biological ChIP-seq replicates are shown. In addition, mRNA expression of  
643 the three example genes Col-0 seedlings (-/+ 2 hours JA) is shown as well. Expression data is  
644 derived from RNA-seq analysis. **d**, Venn diagram illustrates the overlap between MYC2, MYC3  
645 target genes and genes that are differentially expressed after two hours of JA treatment (JA 2h  
646 DEGs). **e, f**, The top-ranked motif in MYC2 (e) and MYC3 (f) ChIP-seq data was the G-box  
647 (CAC/TGTG. Motifs were determined by MEME analysis using the top-ranked peaks that were  
648 identified by GEM Motifs enriched in MYC2 and MYC3 peaks.

### 649 **Figure 2. MYC2 and MYC3 target a large proportion of JA-responsive genes that encode** 650 **transcription factors.**

651 **a, b**, Cluster analysis revealed the two main clusters in the JA time course experiment. The JA  
652 cluster (a) with 796 genes reflects the majority of JA-induced genes and the cell wall cluster (b)  
653 with 647 genes represents the largest cluster of JA repressed genes. Clusters visualize the log2  
654 fold change expression dynamics over the indicated 24 hours' time period. The three strongest  
655 enriched gene ontology terms for each cluster are shown as well. **c**, Bar plots illustrates the portion  
656 of JA differentially expressed genes (JA DEGs) that are bound by MYC2 and/or MYC3 at the  
657 indicated time points. JA DEGs for all time points were identified with RNA-seq. MYC2/3 targets  
658 are derived from ChIP-seq analysis using Col-0 *MYC2::MYC2-Ypet* and Col-0 *MYC3::MYC3-Ypet*

659 seedlings that were treated for two hours with JA. **d**, MYC2 and MYC3 target genes from a wide  
660 range of transcription factor TF families. TF families are classified into four different groups;  
661 MYC2/MYC3 targets and differentially expressed after JA treatment (blue), MYC2/MYC3 targets  
662 and not differentially expressed (orange), not bound by MYC2/MYC3 but differentially expressed  
663 (grey) and not bound by MYC2/MYC3 but not differentially expressed (green). **e**, Nodes represent  
664 JA TFs for which direct binding data was generated. ChIP-seq data is indicated by presence of \*,  
665 all other data was DAP-seq. Edges represent binding events and are directed. Self-loops indicate  
666 TF binds to its own locus, indicative of potential auto-regulation. Expression of the TF at 0.5 h  
667 after JA treatment is represented by color scale. **f**, Pearson correlation of TFs' target sets of  
668 genes. Numerals in brackets indicate total number of target genes

### 669 **Figure 3. The jasmonic acid-responsive epigenome**

670 **a, b, c**, Aggregated profiles show the  $\log_2$  fold change enrichment of MYC2 (a) and H3K4me3 (b,  
671 c) from 2 kb upstream to 2 kb downstream of the transcriptional start site (TSS) at JA-induced  
672 and JA-repressed genes. Profile of MYC2 is shown for Col-0 *MYC2::MYC2-Ypet* (a) seedlings  
673 and H3K4me3 profiles are shown for Col-0 (b) and *myc2* (c) seedlings. **d**, AnnoJ  
674 genome browser screenshot visualizes MYC2 binding, mRNA expression and H3K4me3  
675 occupancy at two example genes (*JAZ2*, *GRX480*) in Col-0 and *myc2* seedlings. All tracks were  
676 normalized to the respective sequencing depth.

### 677 **Figure 4. Loss of functional MYC2 impacts the global proteome and phosphoproteome**

678 **a**, Total significantly differentially abundant ( $q < 0.1$ ) proteins and phosphopeptides detected in  
679 comparisons between JA-treated (2 h) Col-0 and *myc2* seedlings and mock controls. **b**, Venn  
680 diagram showing the overlap between significantly differentially abundant proteins, transcripts  
681 and differentially phosphorylated proteins in JA-treated Col-0 seedlings compared to mock-  
682 treated Col-0 controls. Also shown is the overlap with MYC2/3 target genes. **c**, Correlation  
683 between  $\log_2(\text{FPKM})$ s of detected proteins and transcripts in Col-0 seedlings treated with JA for

684 2 h. Scatter plot of  $\log_2$  fold change in Col-0 JA-regulated transcript levels versus  $\log_2$  fold change  
685 in levels of corresponding proteins. **d**, Heatmap represents relative TPM of 137 isoform pairs  
686 exhibiting isoform switch events. Ratio calculated as  $\log$ TPM (isoform 1/isoform 2). **e**, Plot shows  
687 an example of a transcript pair originating from *AT2G43680* that had isoform switch events  
688 following JA treatment.

689 **Figure 5. JA response genome regulatory model positions known and new components**

690 **a, b**, Subnetworks of STZ (a) and ABO3 (b) are shown. Edges are directed. Red edges exist at  
691 early time points (0.25 – 2 h), blue only at late time points (4 – 24 h). Thicker edges with chevrons  
692 indicate a MYC2 directly bound that gene in ChIP-seq experiments. **c, d**, JA-induced root growth  
693 inhibition assay identified ABO3 as a positive JA regulator. Seedlings were grown on LS media  
694 with (d) or without 50 $\mu$ M MeJA (c). Col-0 and *myc2* seedlings served as controls. **e**, Quantification  
695 of JA-induced root growth inhibition in Col-0 and *abo3* seedlings is shown. **f, g**, Root growth  
696 inhibition assay identified two *cyp708A2* T-DNA alleles as JA hyper-sensitive. Seedlings were  
697 grown on LS media with (f) or without 50 $\mu$ M MeJA (g) and Col-0 and *myc2* seedlings serve as  
698 controls. **h**, Bar plot shows quantification of JA-induced root growth inhibition in Col-0 and  
699 *cyp708A2* seedlings.

700 **Supplementary Figures**

701 **Supplementary Figure 1. MYC2 and MYC3 regulate the majority of JA signaling pathway**  
702 **components**

703 **a**, Gene ontology (GO) analysis of MYC2 and MYC3 targets is shown. Analysis was conducted  
704 using clusterProfiler. **b**, Bar plots shows the portion of JA-induced and JA-repressed genes that  
705 are bound by MYC2 (b) and MYC3 (c). **c**, Binding behavior of MYC2 and MYC3 at known JA  
706 genes (Supplementary Table 4) is shown. Known JA genes are grouped into non-differentially  
707 expressed and JA differentially expressed genes. **d**, Schematic overview of known MYC2/MYC3-  
708 targeted JA pathway components. **e**, AnnoJ genome browser screenshot visualizes MYC2 and

709 MYC3 binding at all 13 members of the JAZ repressor family, as well as at the co-repressor  
710 adaptor protein NINJA. mRNA expression of these genes in untreated/JA-treated Col-0 and *myc2*  
711 seedlings is also shown.

## 712 **Supplementary Figure 2. MYC2 and MYC3 target a large number of TFs**

713 **a.** Cluster analysis revealed the 5 other main clusters in the JA time course experiment. Clusters  
714 visualize the log<sub>2</sub> fold change expression dynamics over the indicated 24 hours' time period. The  
715 three strongest enriched gene ontology terms for each cluster are shown as well. **b,** Pie Chart  
716 indicates the proportions of TFs that are transcriptionally induced by JA, bound by MYC2/MYC3,  
717 or both. **c, d,** Overview of MYC2/MYC3-bound plant hormone genes (c) and TFs (d) is shown.  
718 Plant hormones are abbreviated (ET (ethylene), BR (brassinosteroids), GA (gibberellic acid), ABA  
719 (abscisic acid), SA (salicylic acid), CK (cytokinin), AUX (Auxin), K (karrikin), SL (strigolactones)).

## 720 **Supplementary Figure 3. Overview of MYC-controlled TF network**

721 **a.** Significantly enriched (adjusted  $p < 0.05$ ) gene ontology terms amongst the target of each TF.  
722 For each TF the 4 terms with the lowest p-value are shown, some of which are redundant between  
723 TFs. No enriched terms were detected for DREB2B targets.

## 724 **Supplementary Figure 4. Jasmonic acid shapes the local chromatin architecture**

725 **a,** Bar plot shows the impact of two hours JA treatment on the genome-wide distribution of  
726 H3K4me3 and H2A.Z domains. Occupancy was determined in untreated/JA-treated Col-0 and  
727 *myc2* seedlings using ChIP-seq. SICER was used to identify the number of histone domains that  
728 show an increase (blue) or decrease (orange) of enrichment in response to JA. **b, c,** Heatmaps  
729 show the occupancy of H3K4me3 and H2A.Z from 1 kb upstream to 2 kb downstream of the  
730 transcriptional start site (TSS) at all *Arabidopsis* genes (TAIR10). Heatmaps are shown for  
731 H3K4me3 (b) and H2A.Z (c) in untreated and JA-treated (4 h) Col-0 and *myc2* seedlings. **d,**  
732 Quantification of H3K4me3 and H2A.Z occupancy at *JAZ2* and *GRX480* are shown. It was  
733 calculated as the ratio between the respective ChIP-seq sample and the Col-0 IgG control.

734 **Supplementary Figure 5. The jasmonic acid gene regulatory network**

735 **a**, Illustration of JA gene regulatory network for 1, 2 and 4 h time points. Edges were predicted  
736 using phosphoproteome (green), proteome (orange) and transcriptome (blue) data. Node sizes  
737 are scaled by normalized motif score, with larger nodes indicating greater scores and likely  
738 greater importance within the network. Edges predicted early in the time-series transcriptomic  
739 data are red (0.25 – 2 h), edges predicted late are blue (4 - 24 h). Proteome and  
740 phosphoproteome-data-predicted edges are grey and green, respectively.

741 **Supplementary Figure 6. Gene regulatory network validation against ChIP/DAP-seq data a,**

742 The MYC2 subnetwork is shown. Edges are directional and red edges exist at early time points  
743 (0.25 – 2 h), blue only at late time points (4 – 24 h). Thicker edges with chevrons indicate that  
744 MYC2 were directly bound to that gene in our ChIP-seq experiments. **b**, Validated edges are  
745 those between TFs and first neighbours in the JA gene regulatory network for which the first  
746 neighbour was also a direct target of the TF in ChIP/DAP-seq assays. These edges are indicated  
747 by chevrons. Early time-series transcriptome-predicted edges (0.25 – 2 h) are red and later edges  
748 (4 - 24 h) are blue. Edges detected in the proteomic data are grey and those detected in the  
749 phosphoproteomic data are green.

750 **Supplementary Figure 7 Validation of regulatory network predictions**

751 **a**, Bar plot shows quantification of JA-induced root growth inhibition in the indicated T-DNA alleles.  
752 Seedlings were grown on LS media with or without 50 $\mu$ M MeJA. Col-0 seedlings serve as  
753 independent controls for each tested T-DNA line. **b**, Subnetwork of CYP708A2 is shown.

754 **Supplementary Tables**

755 **Supplementary Table 1.** High-confidence target genes of MYC2 and MYC3 after two hours JA  
756 treatment. Unprocessed summit outputs of biological replicate experiments including p-value  
757 scores. Hormone transcription factors bound by MYC2/3.

758 **Supplementary Table 2.** Differential regulation of all transcripts relative to 0 h abundance  
759 following JA treatment. Tab names indicate time point post-treatment. Calculated by EdgeR with  
760 false discovery rate (FDR)<0.05 indicating statistical significance. FC - fold change. CPM - counts  
761 per million. LR - likelihood ratio.

762 **Supplementary Table 3.** Motifs detected *de novo* within MYC2 and MYC3 target summits. The  
763 data are DREME model outputs for MYC2 and MYC3 high-stringency summits.

764 **Supplementary Table 4.** Expression of 168 known JA genes following JA stimulus and whether  
765 they are bound by MYC2/3 or not. ND indicates non-differentially regulated, as assessed by  
766 EdgeR (FDR<0.05).

767 **Supplementary Table 5.** Details of STEM model of JA-responsive transcripts and details of  
768 transcripts within statistically significant clusters. Input data were the expression values of all  
769 transcripts significantly differentially regulated at any time in the time series relative to 0 h post-  
770 JA stimulus.

771 **Supplementary Table 6.** Target genes of JA transcription factors identified by ChIP-seq  
772 (NAC3/ANAC055, STZ/ZAT10; indicated by \*) and DAP-seq (DREB2B, ATAF2, HY5, RVE2,  
773 ZAT18, TCP23, ERF1, ORA59, WRKY51).

774 **Supplementary Table 7.** Differentially enriched H3K4me3 and H2A.Z domains in JA-treated Col-  
775 0 and *myc2* seedlings.

776 **Supplementary Table 8.** Differentially expressed proteins detected in proteomics analyses.

777 **Supplementary Table 9.** Differentially abundant phosphopeptides detected in phosphoproteomic  
778 analyses.

779 **Supplementary Table 10.** Transcript pairs exhibiting isoform switch events as detected by TSIS  
780 analyses.

781 **Supplementary Table 11.** TPM quantification of transcripts in the JA time-series RNA-seq  
782 against the AtRD2 reference transcriptome.

783 **Supplementary Table 12.** Nodes and edges within the JA response genome regulatory network  
784 model, generated from combined JA (phospho)proteome and transcriptome data. Normalized  
785 motif score of all components is also given.

786 **Supplementary Table 13.** Gene regulatory network validation against ChIP/DAP-seq data.  
787 Validated edges are those between TFs and first neighbours in the JA gene regulatory network  
788 for which the first neighbour was also a direct target of the TF in ChIP/DAP-seq assays. \* indicates  
789 ChIP-seq assay, all others were DAP-seq.

790 **Supplementary Table 14.** List of tested T-DNA lines and T-DNA lines with a JA root growth  
791 inhibition phenotypes.

792 **Supplementary Table 15.** List of parameters used during gene regulatory network  
793 reconstruction.

## 794 **References**

- 795 (2000). Analysis of the genome sequence of the flowering plant *Arabidopsis thaliana*. *Nature*, 408,  
796 796-815.
- 797 Abe, H., Urao, T., Ito, T., Seki, M., Shinozaki, K. and Yamaguchi-Shinozaki, K. (2003).  
798 *Arabidopsis* AtMYC2 (bHLH) and AtMYB2 (MYB) function as transcriptional activators in  
799 abscisic acid signaling. *The Plant cell*, 15, 63-78.
- 800 Aleman, F., Yazaki, J., Lee, M., Takahashi, Y., Kim, A. Y., Li, Z., Kinoshita, T., Ecker, J. R. and  
801 Schroeder, J. I. (2016). An ABA-increased interaction of the PYL6 ABA receptor with  
802 MYC2 Transcription Factor: A putative link of ABA and JA signaling. *Scientific reports*, 6,  
803 28941.
- 804 Alon, U. (2007). Network motifs: theory and experimental approaches. *Nature reviews. Genetics*,  
805 8, 450-61.
- 806 An, C., et al. (2017). Mediator subunit MED25 links the jasmonate receptor to transcriptionally  
807 active chromatin. *Proceedings of the National Academy of Sciences of the United States*  
808 *of America*, 114, E8930-E8939.
- 809 An, F., et al. (2010). Ethylene-induced stabilization of ETHYLENE INSENSITIVE3 and EIN3-  
810 LIKE1 is mediated by proteasomal degradation of EIN3 binding F-box 1 and 2 that requires  
811 EIN2 in *Arabidopsis*. *The Plant cell*, 22, 2384-401.
- 812 Anders, S., Pyl, P. T. and Huber, W. (2015). HTSeq--a Python framework to work with high-  
813 throughput sequencing data. *Bioinformatics*, 31, 166-9.
- 814 Baerenfaller, K., et al. (2008). Genome-scale proteomics reveals *Arabidopsis thaliana* gene  
815 models and proteome dynamics. *Science*, 320, 938-41.
- 816 Bao, S., Hua, C., Huang, G., Cheng, P., Gong, X., Shen, L. and Yu, H. (2019). Molecular Basis  
817 of Natural Variation in Photoperiodic Flowering Responses. *Developmental cell*.
- 818 Bartlett, A., O'malley, R. C., Huang, S. C., Galli, M., Nery, J. R., Gallavotti, A. and Ecker, J. R.  
819 (2017). Mapping genome-wide transcription-factor binding sites using DAP-seq. *Nature*  
820 *protocols*, 12, 1659-1672.



- 821 Bu, Q., Jiang, H., Li, C. B., Zhai, Q., Zhang, J., Wu, X., Sun, J., Xie, Q. and Li, C. (2008). Role of  
822 the Arabidopsis thaliana NAC transcription factors ANAC019 and ANAC055 in regulating  
823 jasmonic acid-signaled defense responses. *Cell research*, 18, 756-67.
- 824 Calixto, C. P. G., et al. (2018). Rapid and Dynamic Alternative Splicing Impacts the Arabidopsis  
825 Cold Response Transcriptome. *The Plant cell*, 30, 1424-1444.
- 826 Chang, K. N., et al. (2013). Temporal transcriptional response to ethylene gas drives growth  
827 hormone cross-regulation in Arabidopsis. *eLife*, 2, e00675.
- 828 Chen, H. Y., Hsieh, E. J., Cheng, M. C., Chen, C. Y., Hwang, S. Y. and Lin, T. P. (2016a). ORA47  
829 (octadecanoid-responsive AP2/ERF-domain transcription factor 47) regulates jasmonic  
830 acid and abscisic acid biosynthesis and signaling through binding to a novel cis-element.  
831 *The New phytologist*, 211, 599-613.
- 832 Chen, X., Huang, H., Qi, T., Liu, B. and Song, S. (2016b). New perspective of the bHLH-MYB  
833 complex in jasmonate-regulated plant fertility in arabidopsis. *Plant signaling & behavior*,  
834 11, e1135280.
- 835 Chini, A., et al. (2007). The JAZ family of repressors is the missing link in jasmonate signalling.  
836 *Nature*, 448, 666-71.
- 837 Chung, H. S., Cooke, T. F., Depew, C. L., Patel, L. C., Ogawa, N., Kobayashi, Y. and Howe, G.  
838 A. (2010). Alternative splicing expands the repertoire of dominant JAZ repressors of  
839 jasmonate signaling. *The Plant journal : for cell and molecular biology*, 63, 613-22.
- 840 Coleman-Derr, D. and Zilberman, D. (2012). Deposition of histone variant H2A.Z within gene  
841 bodies regulates responsive genes. *PLoS genetics*, 8, e1002988.
- 842 Cox, J., Neuhauser, N., Michalski, A., Scheltema, R. A., Olsen, J. V. and Mann, M. (2011).  
843 Andromeda: a peptide search engine integrated into the MaxQuant environment. *Journal*  
844 *of proteome research*, 10, 1794-805.
- 845 Cuellar Perez, A., et al. (2014). The non-JAZ TIFY protein TIFY8 from Arabidopsis thaliana is a  
846 transcriptional repressor. *PloS one*, 9, e84891.
- 847 Cui, H., Qiu, J., Zhou, Y., Bhandari, D. D., Zhao, C., Bautor, J. and Parker, J. E. (2018).  
848 Antagonism of Transcription Factor MYC2 by EDS1/PAD4 Complexes Bolsters Salicylic  
849 Acid Defense in Arabidopsis Effector-Triggered Immunity. *Molecular plant*, 11, 1053-1066.
- 850 Du, M., et al. (2017). MYC2 Orchestrates a Hierarchical Transcriptional Cascade That Regulates  
851 Jasmonate-Mediated Plant Immunity in Tomato. *The Plant cell*, 29, 1883-1906.
- 852 Dubois, M., Van Den Broeck, L., Claeys, H., Van Vlierberghe, K., Matsui, M. and Inze, D. (2015).  
853 The ETHYLENE RESPONSE FACTORS ERF6 and ERF11 Antagonistically Regulate  
854 Mannitol-Induced Growth Inhibition in Arabidopsis. *Plant physiology*, 169, 166-79.
- 855 Elias, J. E. and Gygi, S. P. (2010). Target-decoy search strategy for mass spectrometry-based  
856 proteomics. *Methods in molecular biology*, 604, 55-71.
- 857 Ernst, J. and Bar-Joseph, Z. (2006). STEM: a tool for the analysis of short time series gene  
858 expression data. *BMC bioinformatics*, 7, 191.
- 859 Feng, S., Jacobsen, S. E. and Reik, W. (2010). Epigenetic reprogramming in plant and animal  
860 development. *Science*, 330, 622-7.
- 861 Fernandez-Calvo, P., et al. (2011). The Arabidopsis bHLH transcription factors MYC3 and MYC4  
862 are targets of JAZ repressors and act additively with MYC2 in the activation of jasmonate  
863 responses. *The Plant cell*, 23, 701-15.
- 864 Fernandez, P. C., Frank, S. R., Wang, L., Schroeder, M., Liu, S., Greene, J., Cocito, A. and Amati,  
865 B. (2003). Genomic targets of the human c-Myc protein. *Genes & development*, 17, 1115-  
866 29.
- 867 Field, B. and Osbourn, A. E. (2008). Metabolic diversification--independent assembly of operon-  
868 like gene clusters in different plants. *Science*, 320, 543-7.
- 869 Fonseca, S., Chini, A., Hamberg, M., Adie, B., Porzel, A., Kramell, R., Miersch, O., Wasternack,  
870 C. and Solano, R. (2009). (+)-7-iso-Jasmonoyl-L-isoleucine is the endogenous bioactive  
871 jasmonate. *Nature chemical biology*, 5, 344-50.

- 872 Fonseca, S., et al. (2014). bHLH003, bHLH013 and bHLH017 are new targets of JAZ repressors  
873 negatively regulating JA responses. *PLoS one*, 9, e86182.
- 874 Gao, Q. M., Venugopal, S., Navarre, D. and Kachroo, A. (2011). Low oleic acid-derived repression  
875 of jasmonic acid-inducible defense responses requires the WRKY50 and WRKY51  
876 proteins. *Plant physiology*, 155, 464-76.
- 877 Gimenez-Ibanez, S., Boter, M., Ortigosa, A., Garcia-Casado, G., Chini, A., Lewsey, M. G., Ecker,  
878 J. R., Ntoukakis, V. and Solano, R. (2017). JAZ2 controls stomata dynamics during  
879 bacterial invasion. *The New phytologist*, 213, 1378-1392.
- 880 Godoy, M., Franco-Zorrilla, J. M., Perez-Perez, J., Oliveros, J. C., Lorenzo, O. and Solano, R.  
881 (2011). Improved protein-binding microarrays for the identification of DNA-binding  
882 specificities of transcription factors. *The Plant journal : for cell and molecular biology*, 66,  
883 700-11.
- 884 Guo, Q., Yoshida, Y., Major, I. T., Wang, K., Sugimoto, K., Kapali, G., Havko, N. E., Benning, C.  
885 and Howe, G. A. (2018). JAZ repressors of metabolic defense promote growth and  
886 reproductive fitness in Arabidopsis. *Proceedings of the National Academy of Sciences of  
887 the United States of America*, 115, E10768-E10777.
- 888 Guo, W., Calixto, C. P. G., Brown, J. W. S. and Zhang, R. (2017). TSIS: an R package to infer  
889 alternative splicing isoform switches for time-series data. *Bioinformatics*, 33, 3308-3310.
- 890 Guo, Y., Mahony, S. and Gifford, D. K. (2012). High resolution genome wide binding event finding  
891 and motif discovery reveals transcription factor spatial binding constraints. *PLoS  
892 computational biology*, 8, e1002638.
- 893 Hartmann, L., et al. (2016). Alternative Splicing Substantially Diversifies the Transcriptome during  
894 Early Photomorphogenesis and Correlates with the Energy Availability in Arabidopsis. *The  
895 Plant cell*, 28, 2715-2734.
- 896 Hentrich, M., Bottcher, C., Duchtig, P., Cheng, Y., Zhao, Y., Berkowitz, O., Masle, J., Medina, J.  
897 and Pollmann, S. (2013). The jasmonic acid signaling pathway is linked to auxin  
898 homeostasis through the modulation of YUCCA8 and YUCCA9 gene expression. *The  
899 Plant journal : for cell and molecular biology*, 74, 626-37.
- 900 Hickman, R., et al. (2017). Architecture and Dynamics of the Jasmonic Acid Gene Regulatory  
901 Network. *The Plant cell*, 29, 2086-2105.
- 902 Hou, X., Lee, L. Y., Xia, K., Yan, Y. and Yu, H. (2010). DELLAs modulate jasmonate signaling via  
903 competitive binding to JAZs. *Developmental cell*, 19, 884-94.
- 904 Huang, H., Liu, B., Liu, L. and Song, S. (2017). Jasmonate action in plant growth and  
905 development. *Journal of experimental botany*, 68, 1349-1359.
- 906 Huang, J., Ghosh, R. and Bankaitis, V. A. (2016). Sec14-like phosphatidylinositol transfer proteins  
907 and the biological landscape of phosphoinositide signaling in plants. *Biochimica et  
908 biophysica acta*, 1861, 1352-1364.
- 909 Huot, B., Yao, J., Montgomery, B. L. and He, S. Y. (2014). Growth-defense tradeoffs in plants: a  
910 balancing act to optimize fitness. *Molecular plant*, 7, 1267-1287.
- 911 Ingram, P. J., Stumpf, M. P. and Stark, J. (2006). Network motifs: structure does not determine  
912 function. *BMC genomics*, 7, 108.
- 913 Jin, J., Tian, F., Yang, D. C., Meng, Y. Q., Kong, L., Luo, J. and Gao, G. (2017). PlantTFDB 4.0:  
914 toward a central hub for transcription factors and regulatory interactions in plants. *Nucleic  
915 acids research*, 45, D1040-D1045.
- 916 Kang, H. G., Kim, J., Kim, B., Jeong, H., Choi, S. H., Kim, E. K., Lee, H. Y. and Lim, P. O. (2011).  
917 Overexpression of FTL1/DDF1, an AP2 transcription factor, enhances tolerance to cold,  
918 drought, and heat stresses in Arabidopsis thaliana. *Plant science : an international journal  
919 of experimental plant biology*, 180, 634-41.
- 920 Karasov, T. L., Chae, E., Herman, J. J. and Bergelson, J. (2017). Mechanisms to Mitigate the  
921 Trade-Off between Growth and Defense. *The Plant cell*, 29, 666-680.

- 922 Kaufmann, K., Muino, J. M., Osteras, M., Farinelli, L., Krajewski, P. and Angenent, G. C. (2010).  
923 Chromatin immunoprecipitation (ChIP) of plant transcription factors followed by  
924 sequencing (ChIP-SEQ) or hybridization to whole genome arrays (ChIP-CHIP). *Nature*  
925 *protocols*, 5, 457-72.
- 926 Khan, A. and Mathelier, A. (2017). Intervene: a tool for intersection and visualization of multiple  
927 gene or genomic region sets. *BMC bioinformatics*, 18, 287.
- 928 Kharchenko, P. V., Tolstorukov, M. Y. and Park, P. J. (2008). Design and analysis of ChIP-seq  
929 experiments for DNA-binding proteins. *Nature biotechnology*, 26, 1351-9.
- 930 Kim, D., Pertea, G., Trapnell, C., Pimentel, H., Kelley, R. and Salzberg, S. L. (2013). TopHat2:  
931 accurate alignment of transcriptomes in the presence of insertions, deletions and gene  
932 fusions. *Genome biology*, 14, R36.
- 933 Langmead, B. (2010). Aligning short sequencing reads with Bowtie. *Current protocols in*  
934 *bioinformatics*, Chapter 11, Unit 11 7.
- 935 Langmead, B. and Salzberg, S. L. (2012). Fast gapped-read alignment with Bowtie 2. *Nature*  
936 *methods*, 9, 357-9.
- 937 Li, J., Brader, G., Kariola, T. and Palva, E. T. (2006). WRKY70 modulates the selection of  
938 signaling pathways in plant defense. *The Plant journal : for cell and molecular biology*, 46,  
939 477-91.
- 940 Liu, Y., et al. (2019). MYC2 Regulates the Termination of Jasmonate Signaling via an  
941 Autoregulatory Negative Feedback Loop. *The Plant cell*, 31, 106-127.
- 942 Lorenzo, O., Chico, J. M., Sanchez-Serrano, J. J. and Solano, R. (2004). JASMONATE-  
943 INSENSITIVE1 encodes a MYC transcription factor essential to discriminate between  
944 different jasmonate-regulated defense responses in Arabidopsis. *The Plant cell*, 16, 1938-  
945 50.
- 946 Lorenzo, O., Piqueras, R., Sanchez-Serrano, J. J. and Solano, R. (2003). ETHYLENE  
947 RESPONSE FACTOR1 integrates signals from ethylene and jasmonate pathways in plant  
948 defense. *The Plant cell*, 15, 165-78.
- 949 Lozano-Duran, R., Macho, A. P., Boutrot, F., Segonzac, C., Somssich, I. E. and Zipfel, C. (2013).  
950 The transcriptional regulator BZR1 mediates trade-off between plant innate immunity and  
951 growth. *eLife*, 2, e00983.
- 952 Lun, A. T., Chen, Y. and Smyth, G. K. (2016). It's DE-licious: A Recipe for Differential Expression  
953 Analyses of RNA-seq Experiments Using Quasi-Likelihood Methods in edgeR. *Methods*  
954 *in molecular biology*, 1418, 391-416.
- 955 Machanick, P. and Bailey, T. L. (2011). MEME-CHIP: motif analysis of large DNA datasets.  
956 *Bioinformatics*, 27, 1696-7.
- 957 Magome, H., Yamaguchi, S., Hanada, A., Kamiya, Y. and Oda, K. (2008). The DDF1  
958 transcriptional activator upregulates expression of a gibberellin-deactivating gene,  
959 GA2ox7, under high-salinity stress in Arabidopsis. *The Plant journal : for cell and*  
960 *molecular biology*, 56, 613-26.
- 961 Mangas, S., Bonfill, M., Osuna, L., Moyano, E., Tortoriello, J., Cusido, R. M., Pinol, M. T. and  
962 Palazon, J. (2006). The effect of methyl jasmonate on triterpene and sterol metabolisms  
963 of *Centella asiatica*, *Ruscus aculeatus* and *Galphimia glauca* cultured plants.  
964 *Phytochemistry*, 67, 2041-9.
- 965 Milo, R., Shen-Orr, S., Itzkovitz, S., Kashtan, N., Chklovskii, D. and Alon, U. (2002). Network  
966 motifs: simple building blocks of complex networks. *Science*, 298, 824-7.
- 967 Mittler, R., Kim, Y., Song, L., Coutu, J., Coutu, A., Ciftci-Yilmaz, S., Lee, H., Stevenson, B. and  
968 Zhu, J. K. (2006). Gain- and loss-of-function mutations in *Zat10* enhance the tolerance of  
969 plants to abiotic stress. *FEBS letters*, 580, 6537-42.
- 970 Moreno, J. E., Shyu, C., Campos, M. L., Patel, L. C., Chung, H. S., Yao, J., He, S. Y. and Howe,  
971 G. A. (2013). Negative feedback control of jasmonate signaling by an alternative splice  
972 variant of *JAZ10*. *Plant physiology*, 162, 1006-17.

- 973 Mosblech, A., Thurrow, C., Gatz, C., Feussner, I. and Heilmann, I. (2011). Jasmonic acid  
974 perception by CO11 involves inositol polyphosphates in *Arabidopsis thaliana*. *The Plant*  
975 *journal : for cell and molecular biology*, 65, 949-57.
- 976 Nakata, M., Mitsuda, N., Herde, M., Koo, A. J., Moreno, J. E., Suzuki, K., Howe, G. A. and Ohme-  
977 Takagi, M. (2013). A bHLH-type transcription factor, ABA-INDUCIBLE BHLH-TYPE  
978 TRANSCRIPTION FACTOR/JA-ASSOCIATED MYC2-LIKE1, acts as a repressor to  
979 negatively regulate jasmonate signaling in *Arabidopsis*. *The Plant cell*, 25, 1641-56.
- 980 Ndamukong, I., Abdallat, A. A., Thurrow, C., Fode, B., Zander, M., Weigel, R. and Gatz, C. (2007).  
981 SA-inducible *Arabidopsis* glutaredoxin interacts with TGA factors and suppresses JA-  
982 responsive PDF1.2 transcription. *The Plant journal : for cell and molecular biology*, 50,  
983 128-39.
- 984 O'malley, R. C., Huang, S. S., Song, L., Lewsey, M. G., Bartlett, A., Nery, J. R., Galli, M.,  
985 Gallavotti, A. and Ecker, J. R. (2016). Cistrome and Epicistrome Features Shape the  
986 Regulatory DNA Landscape. *Cell*, 165, 1280-92.
- 987 Patro, R., Duggal, G., Love, M. I., Irizarry, R. A. and Kingsford, C. (2017). Salmon provides fast  
988 and bias-aware quantification of transcript expression. *Nature methods*, 14, 417-419.
- 989 Pauwels, L., et al. (2010). NINJA connects the co-repressor TOPLESS to jasmonate signalling.  
990 *Nature*, 464, 788-91.
- 991 Pauwels, L. and Goossens, A. (2008). Fine-tuning of early events in the jasmonate response.  
992 *Plant signaling & behavior*, 3, 846-7.
- 993 Pauwels, L., Morreel, K., De Witte, E., Lammertyn, F., Van Montagu, M., Boerjan, W., Inze, D.  
994 and Goossens, A. (2008). Mapping methyl jasmonate-mediated transcriptional  
995 reprogramming of metabolism and cell cycle progression in cultured *Arabidopsis* cells.  
996 *Proceedings of the National Academy of Sciences of the United States of America*, 105,  
997 1380-5.
- 998 Pieterse, C. M., Leon-Reyes, A., Van Der Ent, S. and Van Wees, S. C. (2009). Networking by  
999 small-molecule hormones in plant immunity. *Nature chemical biology*, 5, 308-16.
- 1000 Pre, M., Atallah, M., Champion, A., De Vos, M., Pieterse, C. M. and Memelink, J. (2008). The  
1001 AP2/ERF domain transcription factor ORA59 integrates jasmonic acid and ethylene  
1002 signals in plant defense. *Plant physiology*, 147, 1347-57.
- 1003 Quinlan, A. R. and Hall, I. M. (2010). BEDTools: a flexible suite of utilities for comparing genomic  
1004 features. *Bioinformatics*, 26, 841-2.
- 1005 Ren, X., Chen, Z., Liu, Y., Zhang, H., Zhang, M., Liu, Q., Hong, X., Zhu, J. K. and Gong, Z. (2010).  
1006 ABO3, a WRKY transcription factor, mediates plant responses to abscisic acid and  
1007 drought tolerance in *Arabidopsis*. *The Plant journal : for cell and molecular biology*, 63,  
1008 417-29.
- 1009 Robinson, M. D., McCarthy, D. J. and Smyth, G. K. (2010). edgeR: a Bioconductor package for  
1010 differential expression analysis of digital gene expression data. *Bioinformatics*, 26, 139-  
1011 40.
- 1012 Rothbart, S. B. and Strahl, B. D. (2014). Interpreting the language of histone and DNA  
1013 modifications. *Biochimica et biophysica acta*.
- 1014 Sasaki-Sekimoto, Y., Jikumaru, Y., Obayashi, T., Saito, H., Masuda, S., Kamiya, Y., Ohta, H. and  
1015 Shirasu, K. (2013). Basic helix-loop-helix transcription factors JASMONATE-  
1016 ASSOCIATED MYC2-LIKE1 (JAM1), JAM2, and JAM3 are negative regulators of  
1017 jasmonate responses in *Arabidopsis*. *Plant physiology*, 163, 291-304.
- 1018 Schweizer, F., Bodenhausen, N., Lassueur, S., Masclaux, F. G. and Reymond, P. (2013a).  
1019 Differential Contribution of Transcription Factors to *Arabidopsis thaliana* Defense Against  
1020 *Spodoptera littoralis*. *Frontiers in plant science*, 4, 13.
- 1021 Schweizer, F., et al. (2013b). *Arabidopsis* basic helix-loop-helix transcription factors MYC2,  
1022 MYC3, and MYC4 regulate glucosinolate biosynthesis, insect performance, and feeding  
1023 behavior. *The Plant cell*, 25, 3117-32.

- 1024 Sheard, L. B., et al. (2010). Jasmonate perception by inositol-phosphate-potentiated COI1-JAZ  
1025 co-receptor. *Nature*, 468, 400-5.
- 1026 Shibata, M., et al. (2018). GTL1 and DF1 regulate root hair growth through transcriptional  
1027 repression of ROOT HAIR DEFECTIVE 6-LIKE 4 in Arabidopsis. *Development*, 145.
- 1028 Shyu, C., et al. (2012). JAZ8 lacks a canonical degron and has an EAR motif that mediates  
1029 transcriptional repression of jasmonate responses in Arabidopsis. *The Plant cell*, 24, 536-  
1030 50.
- 1031 Song, L., et al. (2016). A transcription factor hierarchy defines an environmental stress response  
1032 network. *Science*, 354.
- 1033 Song, S., Huang, H., Wang, J., Liu, B., Qi, T. and Xie, D. (2017). MYC5 is Involved in Jasmonate-  
1034 Regulated Plant Growth, Leaf Senescence and Defense Responses. *Plant & cell  
1035 physiology*, 58, 1752-1763.
- 1036 Thines, B., et al. (2007). JAZ repressor proteins are targets of the SCF(COI1) complex during  
1037 jasmonate signalling. *Nature*, 448, 661-5.
- 1038 Tyanova, S., Temu, T. and Cox, J. (2016). The MaxQuant computational platform for mass  
1039 spectrometry-based shotgun proteomics. *Nature protocols*, 11, 2301-2319.
- 1040 Van Aken, O., Zhang, B., Law, S., Narsai, R. and Whelan, J. (2013). AtWRKY40 and AtWRKY63  
1041 modulate the expression of stress-responsive nuclear genes encoding mitochondrial and  
1042 chloroplast proteins. *Plant physiology*, 162, 254-71.
- 1043 Vanstraelen, M. and Benkova, E. (2012). Hormonal interactions in the regulation of plant  
1044 development. *Annual review of cell and developmental biology*, 28, 463-87.
- 1045 Walley, J. W., et al. (2016). Integration of omic networks in a developmental atlas of maize.  
1046 *Science*, 353, 814-8.
- 1047 Wang, C., Liu, Y., Li, S. S. and Han, G. Z. (2015). Insights into the origin and evolution of the plant  
1048 hormone signaling machinery. *Plant physiology*, 167, 872-86.
- 1049 Wang, H., et al. (2019). MED25 connects enhancer-promoter looping and MYC2-dependent  
1050 activation of jasmonate signalling. *Nature plants*, 5, 616-625.
- 1051 Wild, M., Daviere, J. M., Cheminant, S., Regnault, T., Baumberger, N., Heintz, D., Baltz, R.,  
1052 Genschik, P. and Achard, P. (2012). The Arabidopsis DELLA RGA-LIKE3 is a direct target  
1053 of MYC2 and modulates jasmonate signaling responses. *The Plant cell*, 24, 3307-19.
- 1054 Xiao, J., Jin, R. and Wagner, D. (2017). Developmental transitions: integrating environmental  
1055 cues with hormonal signaling in the chromatin landscape in plants. *Genome biology*, 18,  
1056 88.
- 1057 Xie, D. X., Feys, B. F., James, S., Nieto-Rostro, M. and Turner, J. G. (1998). COI1: an Arabidopsis  
1058 gene required for jasmonate-regulated defense and fertility. *Science*, 280, 1091-4.
- 1059 Xie, M., Chen, H., Huang, L., O'neil, R. C., Shokhirev, M. N. and Ecker, J. R. (2018). A B-ARR-  
1060 mediated cytokinin transcriptional network directs hormone cross-regulation and shoot  
1061 development. *Nature communications*, 9, 1604.
- 1062 Xu, J., Li, Y., Wang, Y., Liu, H., Lei, L., Yang, H., Liu, G. and Ren, D. (2008). Activation of MAPK  
1063 kinase 9 induces ethylene and camalexin biosynthesis and enhances sensitivity to salt  
1064 stress in Arabidopsis. *The Journal of biological chemistry*, 283, 26996-7006.
- 1065 Yu, G., Wang, L. G., Han, Y. and He, Q. Y. (2012). clusterProfiler: an R package for comparing  
1066 biological themes among gene clusters. *Omics : a journal of integrative biology*, 16, 284-  
1067 7.
- 1068 Zander, M., Chen, S., Imkampe, J., Thurow, C. and Gatz, C. (2012). Repression of the  
1069 Arabidopsis thaliana jasmonic acid/ethylene-induced defense pathway by TGA-interacting  
1070 glutaredoxins depends on their C-terminal ALWL motif. *Molecular plant*, 5, 831-40.
- 1071 Zang, C., Schones, D. E., Zeng, C., Cui, K., Zhao, K. and Peng, W. (2009). A clustering approach  
1072 for identification of enriched domains from histone modification ChIP-Seq data.  
1073 *Bioinformatics*, 25, 1952-8.

- 1074 Zhang, F., et al. (2017). Structural insights into alternative splicing-mediated desensitization of  
1075 jasmonate signaling. *Proceedings of the National Academy of Sciences of the United*  
1076 *States of America*, 114, 1720-1725.
- 1077 Zhang, F., et al. (2015a). Structural basis of JAZ repression of MYC transcription factors in  
1078 jasmonate signalling. *Nature*, 525, 269-73.
- 1079 Zhang, R., et al. (2015b). AtRTD - a comprehensive reference transcript dataset resource for  
1080 accurate quantification of transcript-specific expression in *Arabidopsis thaliana*. *The New*  
1081 *phytologist*, 208, 96-101.
- 1082 Zhang, X., Zhu, Z., An, F., Hao, D., Li, P., Song, J., Yi, C. and Guo, H. (2014). Jasmonate-  
1083 activated MYC2 represses ETHYLENE INSENSITIVE3 activity to antagonize ethylene-  
1084 promoted apical hook formation in *Arabidopsis*. *The Plant cell*, 26, 1105-17.
- 1085 Zhang, Y., et al. (2008). Model-based analysis of ChIP-Seq (MACS). *Genome biology*, 9, R137.
- 1086 Zhou, R., Benavente, L. M., Stepanova, A. N. and Alonso, J. M. (2011). A recombineering-based  
1087 gene tagging system for *Arabidopsis*. *The Plant journal : for cell and molecular biology*,  
1088 66, 712-23.
- 1089 Zhu, L. J., Gazin, C., Lawson, N. D., Pages, H., Lin, S. M., Lapointe, D. S. and Green, M. R.  
1090 (2010). ChIPpeakAnno: a Bioconductor package to annotate ChIP-seq and ChIP-chip  
1091 data. *BMC bioinformatics*, 11, 237.
- 1092
- 1093

# Figure 1

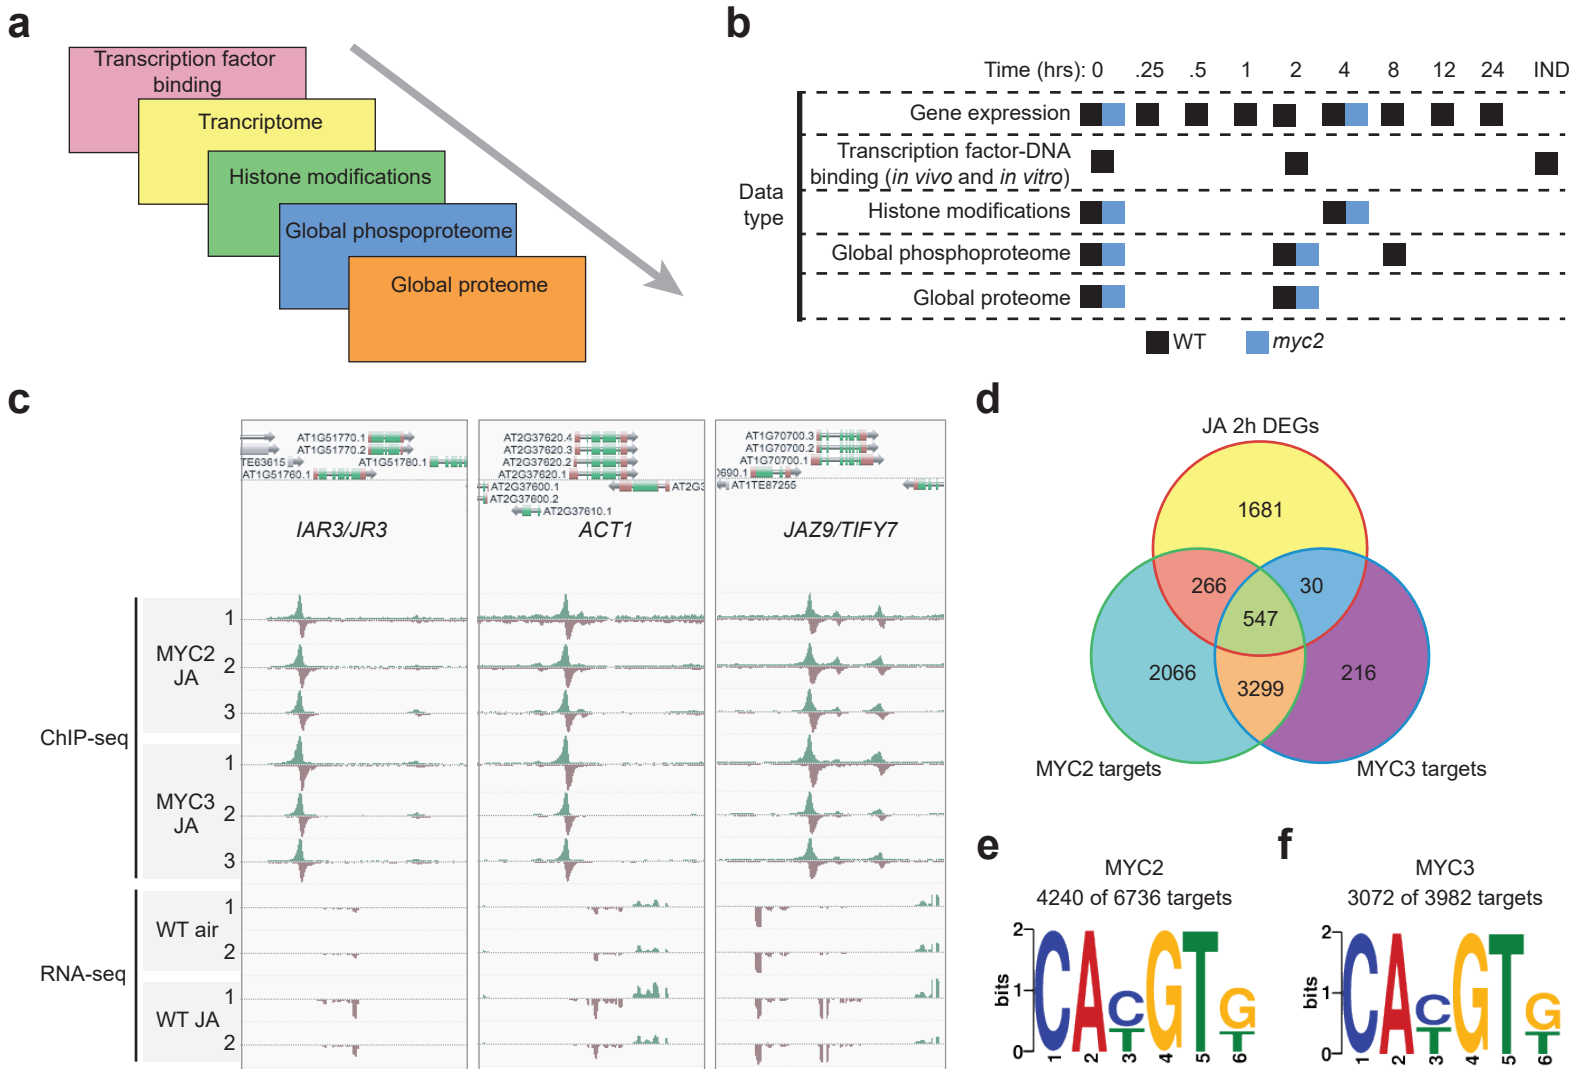

# Figure 2

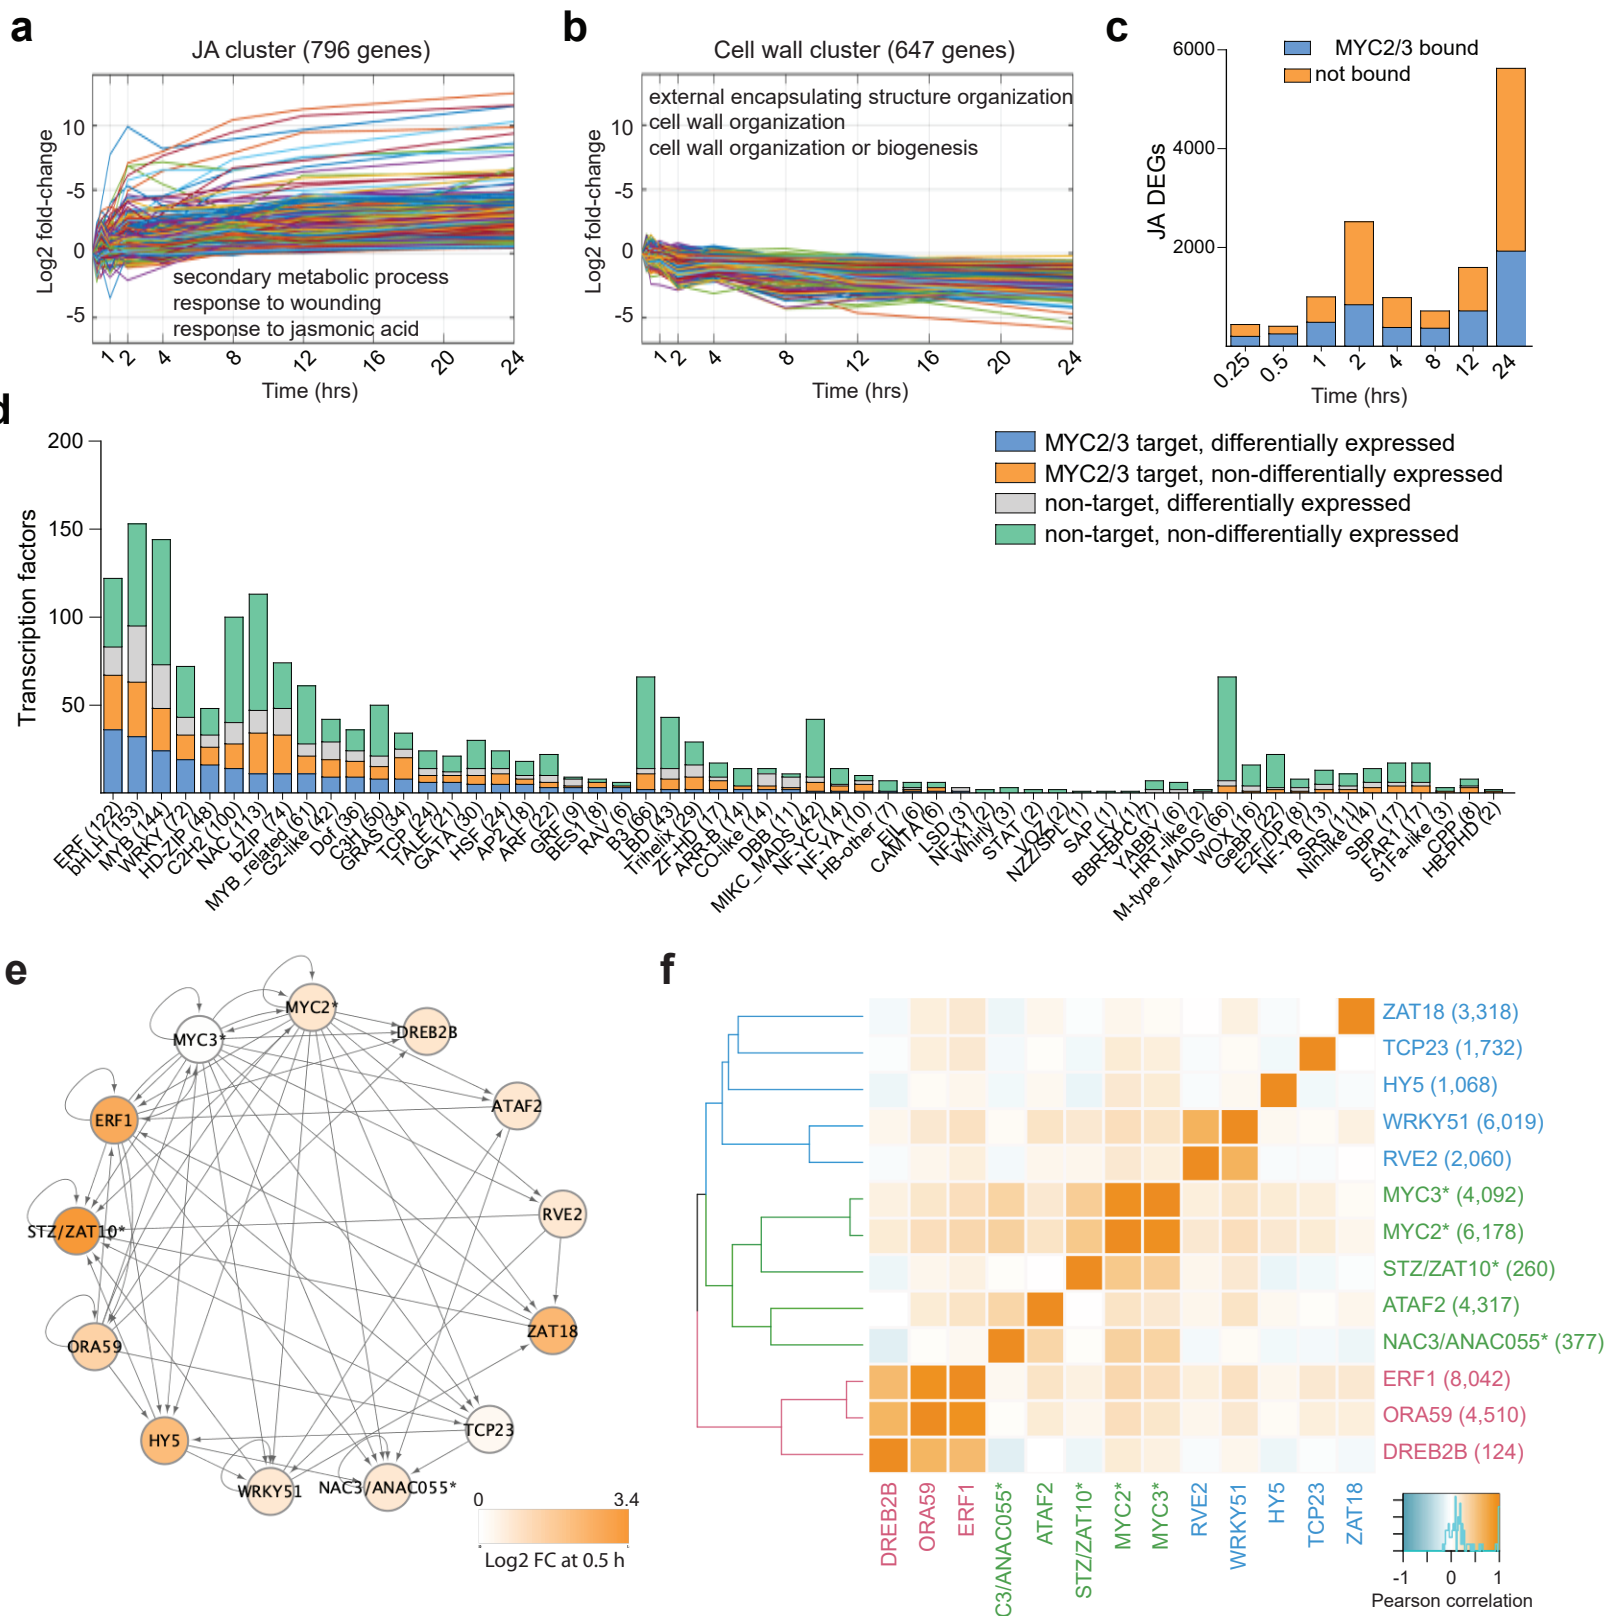



## Figure 3

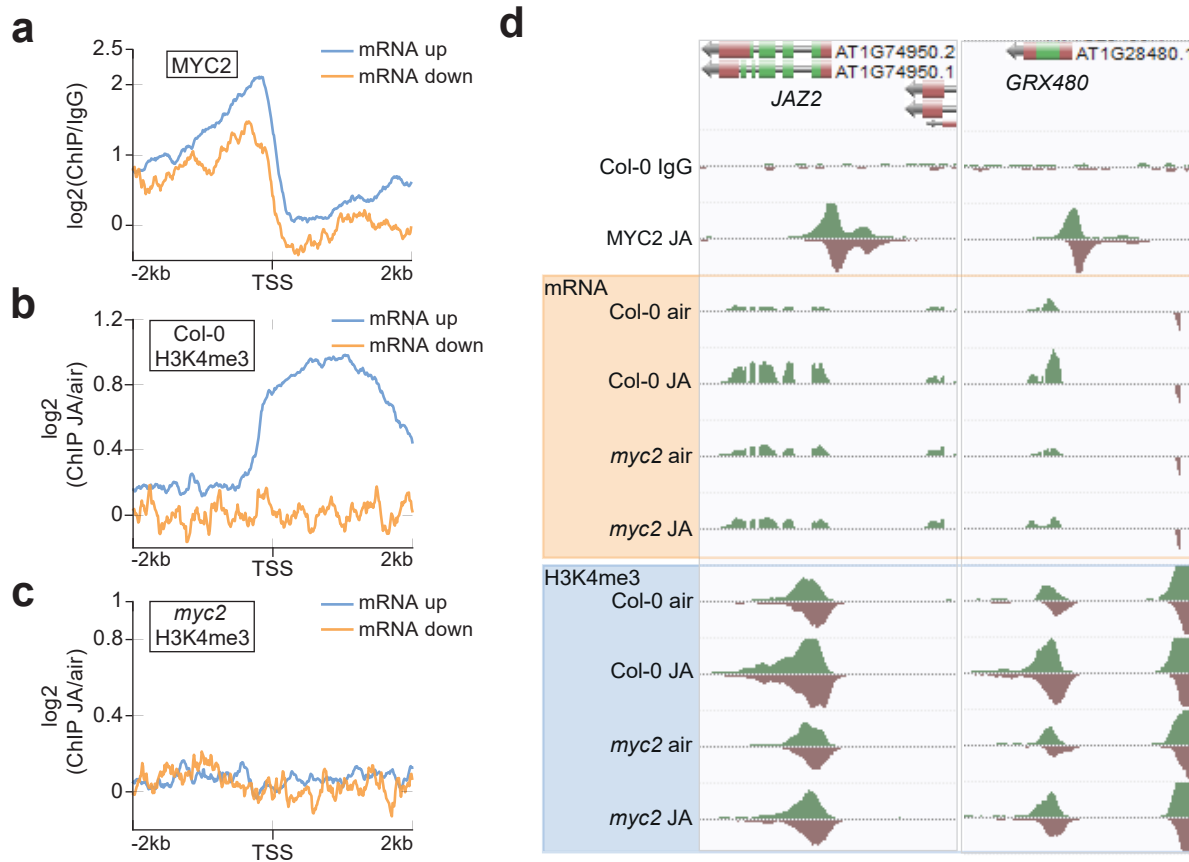

## Figure 4

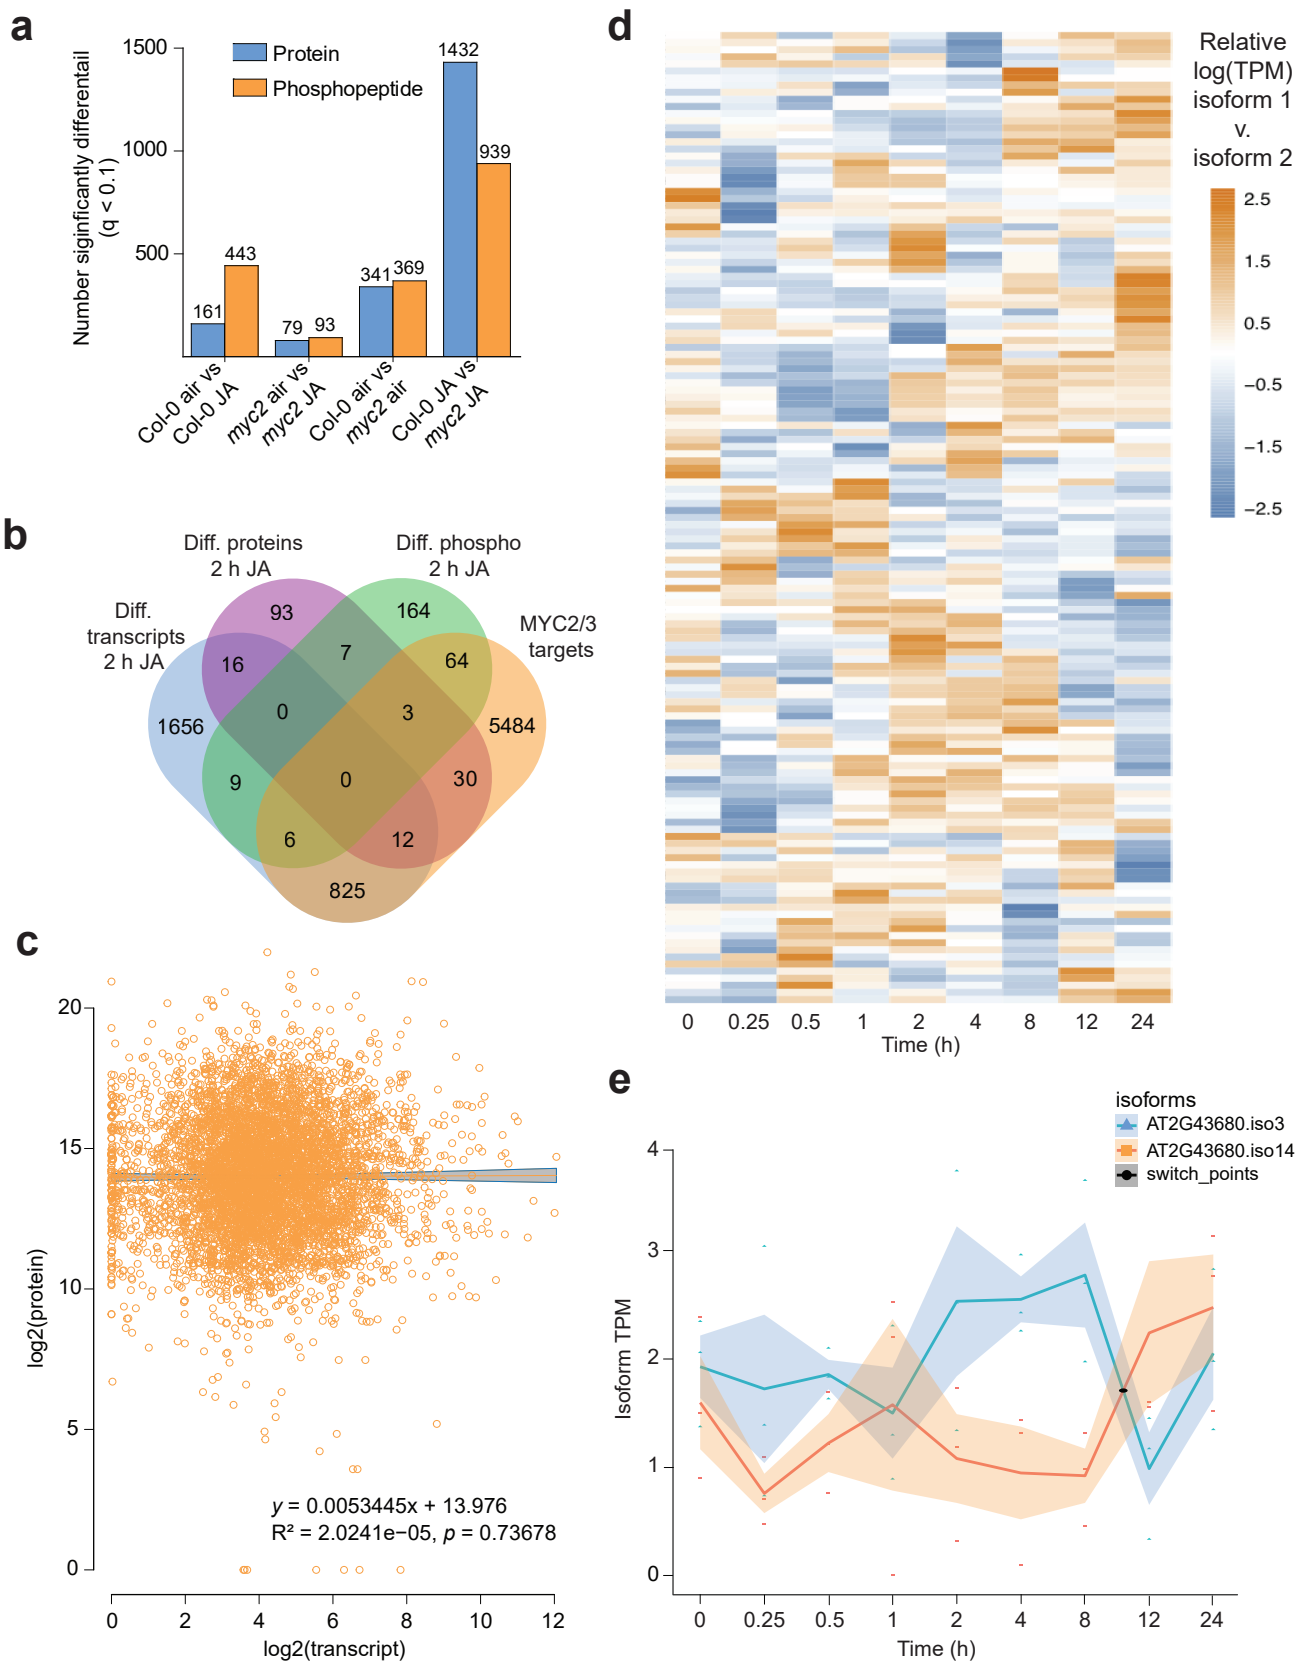

# Figure 6

**a**

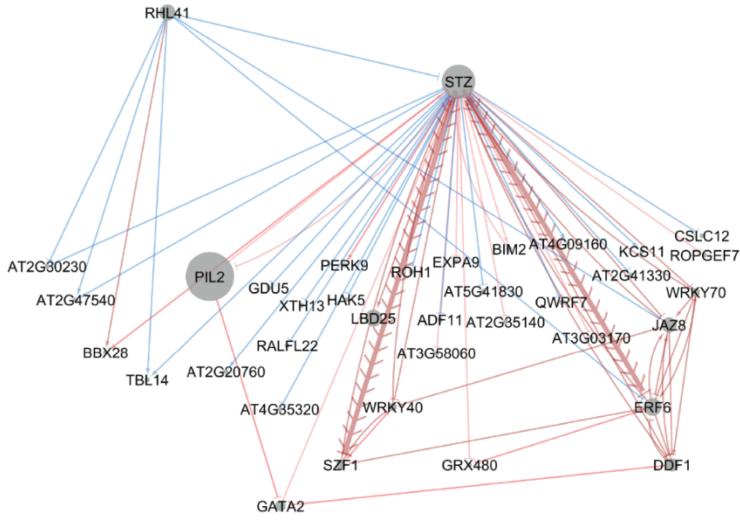

**b**

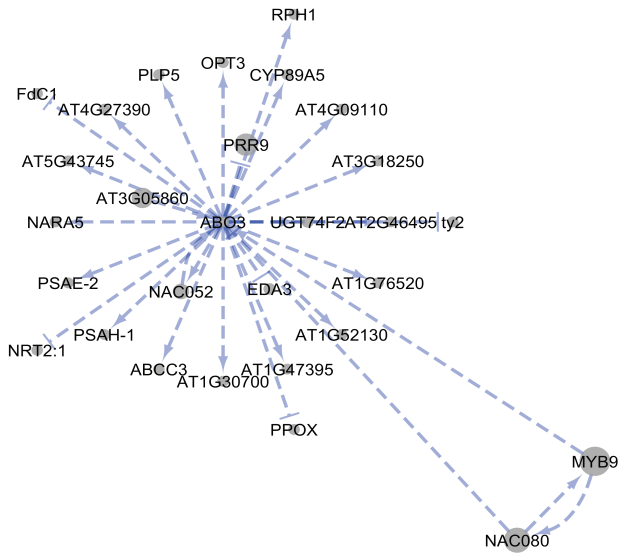

**c**

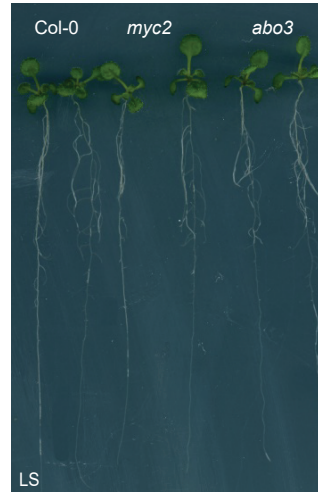

**d**

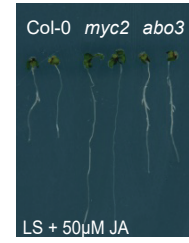

**e**

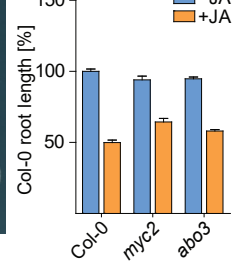

**f**

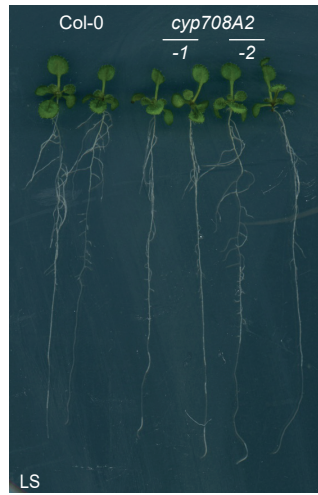

**g**

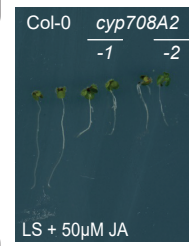

**h**

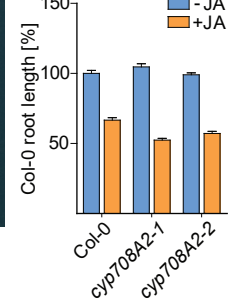

Source: https://www.biorxiv.org/content/10.1101/736363v1.full.pdf
